# Supplementary material for: A facile and cheap synthesis of zwitterion coatings of the CS@PGMA@IDA nanomaterial for highly specific enrichment of glycopeptides
Source: Royal Society of Chemistry journal article supplement (doi:10.1039/c5cc10416e), 2016-01-01
Supplement: c5cc10416e1.pdf [file c5cc10416e1.pdf]

## Supporting Information

### **Facile and Cheap Synthesis of CS@PGMA@IDA Nanomaterial for Highly Specific**

### **Enrichment of Glycopeptides**

Xiajuan Zou,<sup>a</sup> \* Jianzheng Jie,<sup>b</sup> and Bin Yang<sup>a</sup>

#### **Experimental Procedures**

##### **Chemicals and Materials**

Glycidyl methacrylate (GMA, for GC, ≥97.0%, Fluke, Buchs, Switzerland), 2,5-dihydroxybenzoic acid (DHB), α-cyano-4-hydroxycinnamic acid (CHCA), tris(2-carboxyethyl)phosphine (TCEP), iodoacetamide, trifluoroacetic acid (TFA), acetonitrile (ACN) (HPLC grade), acetic anhydride, *d*<sub>6</sub>-acetic anhydride, horseradish peroxidase (HRP, 98%) and bovine serum albumin (BSA, 98%) were obtained from Sigma Aldrich (St. Louis, MO, USA), Intravenous immunoglobulin G (IgG) was from Wuhan institute of biological products Co. Ltd, PNGase F was from New England Biolabs (Ipswich, MA). Iminodiacetic acid (IDA) was obtained from Beijing chemical factory (Beijing, China). Chitosan (Mw=500,000g/mol) was obtained from Qingdao Hecreat Bio-tech Company (Qingdao, China), other chemical reagents were analytical grade.

##### **Synthesis of CS@PGMA@IDA nanomaterial**

CS@PGMA was synthesized according to previous report with some modification<sup>1</sup>. 0.5 g chitosan was dissolved in diluted acetic acid with strong agitation. 1.0 mL GMA was added and the reaction mixture was heated for 2 h at 70 °C with 0.035g ammonium persulfate and 0.035g sodium thiosulfate as redox catalysts. The

polymerization and grafting reaction was finalized by raising the temperature to 80 °C for an additional 2 h. The suspension was then centrifuged and washed with a large volume of deionized water in order to extract the matrix product chitosan@PGMA (**2**).

The CS@PGMA matrix (**2**) was dispersed in 0.5 g IDA solution, prepared by dissolving IDA in 20 mL of a 2 M sodium carbonate solution for 6 h at 65 °C with stirring. The final CS@PGMA@IDA (**3**) product was centrifuged and washed with deionized water until pH neutral, dried at room temperature and ground into final powder with a mortar. The total of the product is 1.50 mg.

### **Reduction, alkylation, protein digestion**

HRP and IgG was dissolved in ammonium bicarbonate (50 mM, pH 8.3) to a final concentration of 1 mg mL/L, and denatured at 95 °C for 15 min. Sequencing grade trypsin (V5111, Promega) was added to the protein solution and the digestion performed overnight at 37 °C and was stopped with 2 % TFA.

BSA was dissolved in a solution containing ammonium bicarbonate (50 mM, pH 8.3) and TCEP (10 mM) and then incubated at 67 °C for about 15 min. The reduced protein was then alkylated with iodoacetamide (50 mM) at RT in the dark for 45 min. Sequencing grade trypsin (V5111, Promega) was added to the protein solution and the digestion performed overnight at 37 °C and was stopped with 2 % TFA.

### **Tube-gel**

For the preparation of human serum digestion, 2 µL human serum, 14.25 µL water, 45 µL of Tris-HCl buffer (pH 8.8), 35 µL of 30% acrylamide solution, 1 µL 10% SDS and

2.5  $\mu\text{L}$  of 10% ammonium persulfate were added to a 1.5 mL Eppendorf tube. The mixture was vortexed for 0.5 min. Then 0.25  $\mu\text{L}$  TEMED was added.

The gel was fixed with 50% methanol, 12% acetic acid for 30 mins at room temperature and cut into small pieces. The gel pieces were dehydrated with ACN and reduced with 10 mM TCEP for 10 min at 67  $^{\circ}\text{C}$ , then alkylated with 50 mM iodoacetamide at RT in the dark for 45 min. Gel pieces were washed with 50% ACN / 50mM  $\text{NH}_4\text{HCO}_3$  buffer and dehydrated with ACN. The gel was rehydrated with 100  $\mu\text{L}$  of 10 ng/ $\mu\text{L}$  trypsin in 25 mM  $\text{NH}_4\text{HCO}_3$  buffer at 4  $^{\circ}\text{C}$  for 2 hrs and then incubated at 37  $^{\circ}\text{C}$  overnight. After enzyme digestion, the peptides mixture was extracted with ACN / 5% FA (2:1) twice and lyophilized to dryness.

### **Glycopeptides enrichment**

CS@PGMA@IDA nanomaterial (0.5 mg) was placed in a 0.5 mL eppendorf tube, and then added to 200  $\mu\text{L}$  of peptide mixture from tryptic digestion in binding buffer, and the entire suspension mixture was incubated on a platform shaker at 900 rpm at 30  $^{\circ}\text{C}$  for 20 min. After centrifugation at 13000 rpm for 2 min, the supernatant was discarded, followed by rinsed with of the loading buffer ( $3 \times 200 \mu\text{L}$ ). Then, 5  $\mu\text{L}$  of 50% ACN aqueous solution or more elution buffer (30% (v/v) ACN, 0.1% TFA) was added to release the glycopeptides from the CS@PGMA@IDA nanomaterial over a period of 20 min.

For glycopeptides enrichment from complex sample, digests extracted from 2  $\mu\text{L}$  serum were redissolved in 400  $\mu\text{L}$  of loading buffer ACN/ $\text{H}_2\text{O}$ /TFA 89: 6: 5, v/v/v) and the entire suspension mixture was incubated on a platform shaker at 900 rpm at 30

°C for 20 min. After centrifugation at 13000 rpm for 2 min, the supernatant was discarded. Unbound peptides were eliminated by washing with 200 µL of 89% ACN / 3% TFA, 89% ACN / 2% TFA loading buffer respectively, followed by washing with 200 µL of 85% ACN / 0.5% H<sub>3</sub>PO<sub>4</sub> one time, and then eluted with the eluting buffer (30% (v/v) ACN, 0.1% TFA v/v, 30 µL) twice. Finally, the eluted glycopeptides were lyophilized and deglycosylated for LC-MS/MS analysis.

### **Deglycosylation of N-linked glycopeptides by PNGase F**

The captured glycopeptides were redissolved in NH<sub>4</sub>HCO<sub>3</sub> (25 mM), 50 units of PNGase F was added to the solution and incubated at 37 °C for overnight. The reaction solutions were directly spotted on the target plate for MALDI-TOF-MS analysis or analysis by LC-MS/MS.

For glycopeptides enrichment from serum, 500 units of PNGase F was added to the solution and incubated at 37 °C for overnight. The reaction solutions were lyophilized, redissolved in 20 µL of 2% ACN/ 0.1% FA solution for LC-MS/MS analysis.

### **MALDI-TOF MS process**

0.5 µL of peptides-loaded CS@PGMA@IDA nanomaterial mixture was loaded onto a stainless steel target, and 0.6 µL of a mixture of 20 mg/ mL DHB in 50% (v/v) ACN and 1% H<sub>3</sub>PO<sub>4</sub> was added as matrix. Aspirate and dispense the above mixture at least 20 cycles with tip. MALDI-TOF mass spectra were acquired on an AXIMA-CFP plus (KRATOS Analytical, Shimadzu Group Company, Japan) mass spectrometer equipped with a nitrogen laser (337.1 nm). Mass spectra were obtained in positive ion and linear mode with an acceleration voltage of 20kV and an average of over 200 laser

shots. Mass spectrometric data analysis was performed using Launchpad V 2. 4 Kompact MALDI software. Data analysis was carried out using Kompact MALDI software with default parameters. Each spectrum was externally calibrated with insulin (5734.62). Each spectrum was internally calibrated with HRP digestion fragment ions at  $m/z$  1842.0, 3353.5 and 4984.2.

### **Reversed phase nano-liquid chromatography tandem mass spectrometry (nano-LC-MS/MS)**

The deglycosylated peptides (10 $\mu$ L) were loaded on a C18 pre-column (Thermo Scientific) and separated by nano-LC-MS/MS using an Easy-LC nano-HPLC (Thermo Scientific). For a gradient separation, H<sub>2</sub>O/FA (99.9:0.1) was used as the mobile phase A while ACN/FA (99.9:0.1) was mobile phase B. At first, from 5% to 30% for 90 min, from 30% to 50% for 10 min, then from 50% to 100% for 10 min, and held at 100% for 10 min. The flow rate was 300 nL/min. Mass spectrometric analysis was performed using an LTQ Orbitrap Velos pro (Thermo Scientific, Bremen, Germany). The spray voltage was operated at 2.2 kV with the ion transfer capillary at 250 °C. The MS/MS spectra were obtained in a data-dependent collision induced dissociation (CID) mode, and the full MS was acquired from  $m/z$  350 to 2000 with resolution 60, 000. The top 15 most intense ions were selected to for MS/MS. Parameters for acquiring CID were as follows: activation time = 10 ms, normalized energy = 35, Q-activation = 0.25. The dynamic exclusion was set as follows: repeat count 1, duration 30 s, exclusion list size 500 and an exclusion duration 30 s.

### **Database search and data analysis**

Raw files were analyzed using Proteome Discoverer v1.4.1.14 (Thermo Scientific). MS/MS spectra were searched against UniProt Human database (Sep 2014, 146,661 entries). The search parameters were set as follows: fixed modification of cysteine residues (+57 Da), variable modification of methionine oxidation (+16 Da), asparagine and glutamine deamidation (+0.9858) and full trypsin cleavage, at most one missed tryptic cleavage sites, 10 ppm error tolerance in MS and 0.6 Da error tolerance in MS/MS. False discovery rates were obtained using Percolator<sup>2</sup> selecting identification with a q-value equal or less than 0.01.

#### **Recovery estimation of glycopeptides enrichment:**

Two of the same amounts of human IgG (3 µg) digest were firstly labeled with light and heavy isotopes by using a stable isotope acetylate labeling approaches according to a previously reported procedure with some modification<sup>3</sup>. 1 µL of 0.1 M acetic anhydride, and *d*<sub>6</sub>-acetic anhydride were added to the tubes containing the IgG digest, respectively. 10µL of 50 mM NH<sub>4</sub>HCO<sub>3</sub> was added to each tube, sonicated for 20 min. Then, 5µL of 0.1 M glycine was added to react with the excessive acetic anhydride and *d*<sub>6</sub>-acetic anhydride. The reaction solutions were lyophilized. The heavy-tagged human IgG digest was enriched with CS@PGMA@IDA according to above-mentioned procedure and the resulting eluted fraction was spiked into light-tagged human IgG digest. The combined mixture was re-enriched with CS@PGMA@IDA, and the eluant was deglycosylated, followed by MALDI-TOF MS analysis. The recovery was calculated by the peak intensity ration of heavy isotope-labeled glycopeptides to the light isotope-labeled glycopeptides.

## Characterization

SEM (scanning electron microscope) image was performed with a JSM-5600LV (JEOL Company, Japan) instrument. Powder X-ray diffraction was analyzed using MiniFlex 300/600 (Rigaku Co., Tokyo, Japan) equipped with X-radiation source at a 40 kV voltage and 15 mA current. The samples were scanned from 3 to 100 ( $2\theta$ ) with a 5°/min scan speed. Fourier transformed infrared spectroscopy (FT-IR) characterization was measured on NEXUS-470 (nicolet, USA). Zeta potential analyses were performed using a Malvern Zetasizer Nano ZS (Malvern, U.K.) at 25 °C. Thermogravimetric analyses (TGA) were detected with SDT Q600 instrument under a nitrogen atmosphere ( $100 \text{ mL min}^{-1}$ ) at a heating rate of  $10 \text{ }^\circ\text{C min}^{-1}$  from 20 to 600 °C (Thermal Analysis, USA). The contact angles were measured by OCA20 (Krüss, Hamburg, German). The nitrogen adsorption and desorption isotherms were measured by ASAP2020 QuadrasorbSI (Quadraorb, Wisconsin, USA). The Brunauer-Emmett-Teller (BET) method was used to calculate the specific surface areas with adsorption data in a relative pressure range from 0.0799 to 0.1998. The BJH pore-size distribution curve was obtained by nitrogen adsorption results. Elemental analyses were performed on Vario EL III (Elementar, Hanau, Germany). And the amount of IDA functionalized on the surface of nanosphere were calculated based the change of nitrogen content between before and after reaction according to a reported method <sup>4</sup>.

$$\chi_{IDA} (\text{nmol.mg}^{-1}) = \frac{\%X * 10^6}{(AM)n100(1 - \% \frac{X(MW)}{(AM)n100})} \quad \text{Eq.S1}$$

where %X is the percent of nitrogen increase in the bonded support as determined by elemental analysis,  $AM$  is the atomic mass of nitrogen,  $MW$  is the molecular weight of the species bonded to the surface of support,  $n$  is the number of nitrogen atoms present in the bonded species.

#### Reference

1. X. Zou, D. Liu, L. Zhong, B. Yang, Y. Lou, B. Hu and Y. Yin, *Anal. Bioanal. Chem.*, 2011, **401**, 1251-1261.
2. L. Kall, J. D. Canterbury, J. Weston, W. S. Noble and M. J. MacCoss, *Nat Methods*, 2007, **4**, 923-925.
3. Y. Yu, J. Cui, X. Wang, Y. Liu and P. Yang, *Proteomics*, 2004, **4**, 3112–3120.
4. C. E. Kibbey and M. E. Meyerhofer, *Anal. Chem*, 1993, **65**, 2189-2196.

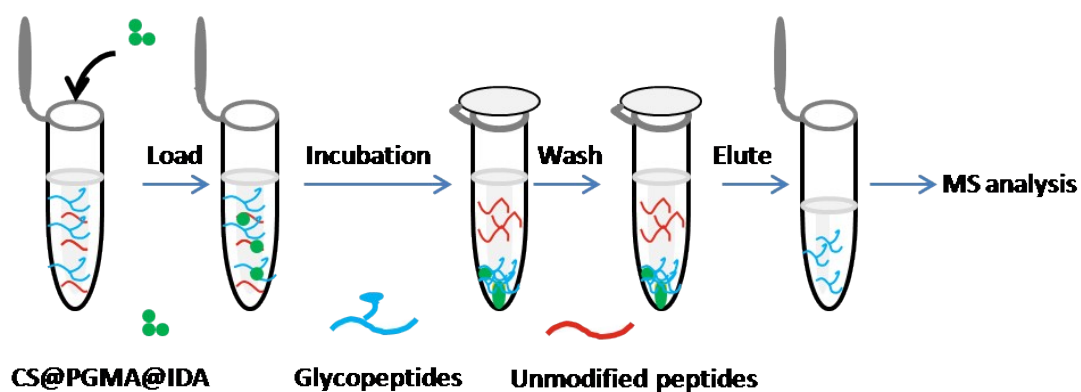

**Scheme S1** Procedure for glycopeptides enrichment



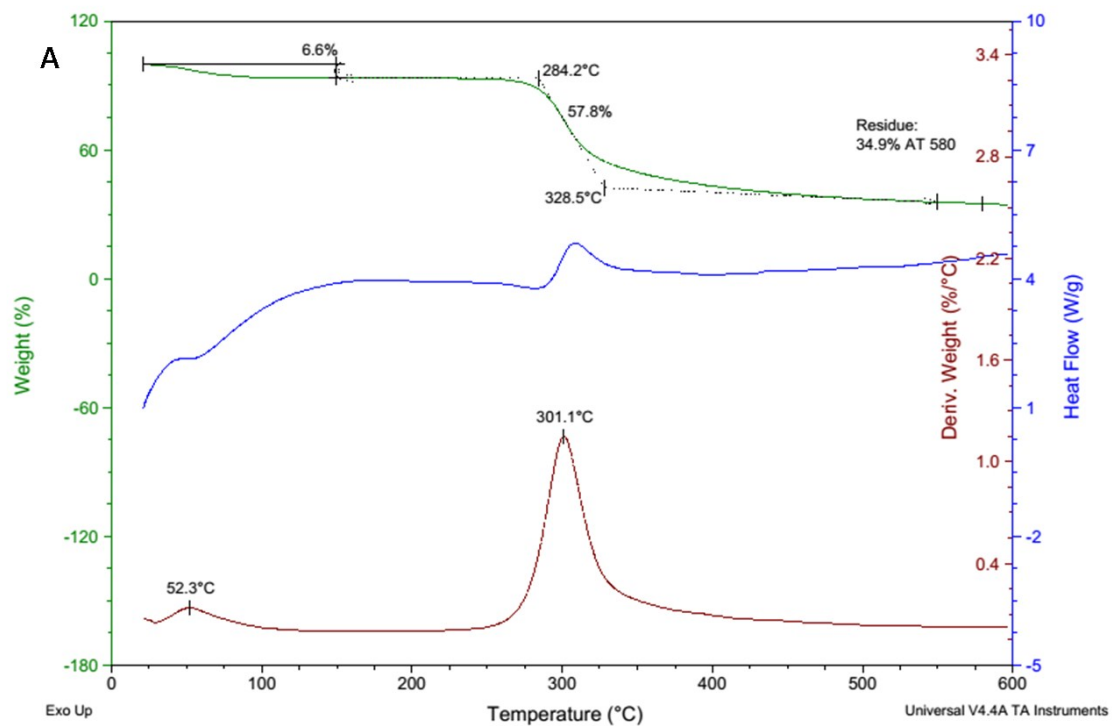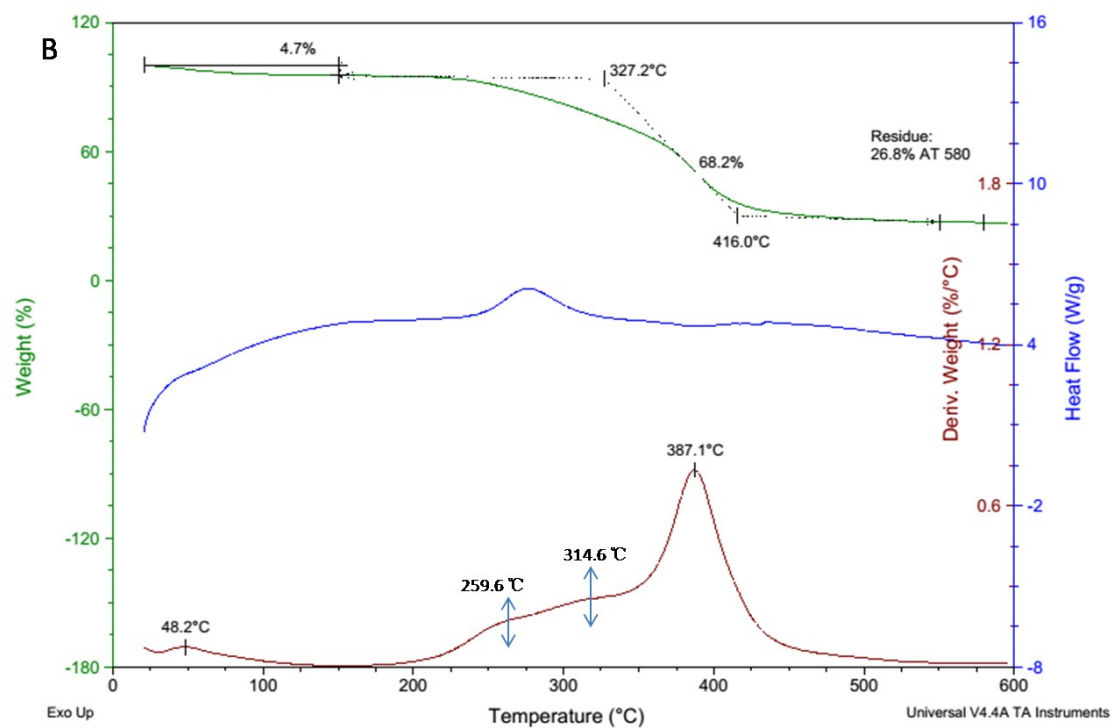

**Fig. S1** DSC-TGA curves for A) CS and B) CS@PGMA@IDA .

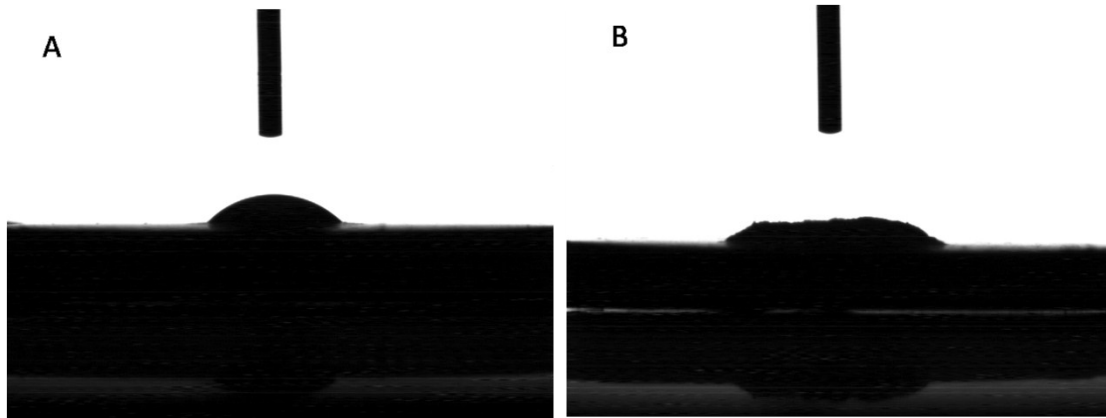

Fig. S2 Contact angles of CS@PGMA@IDA, A) just contacted and B) 2 s later.

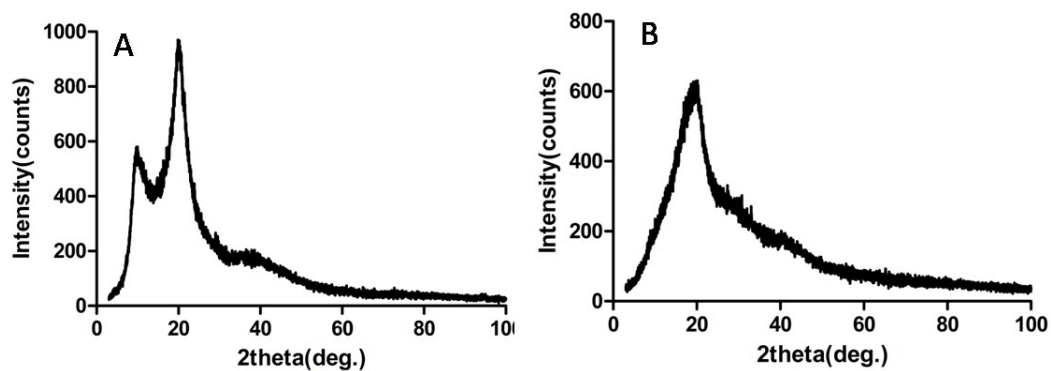

Fig. S3 XRD profiles of A) CS and B) CS@PGMA@IDA.

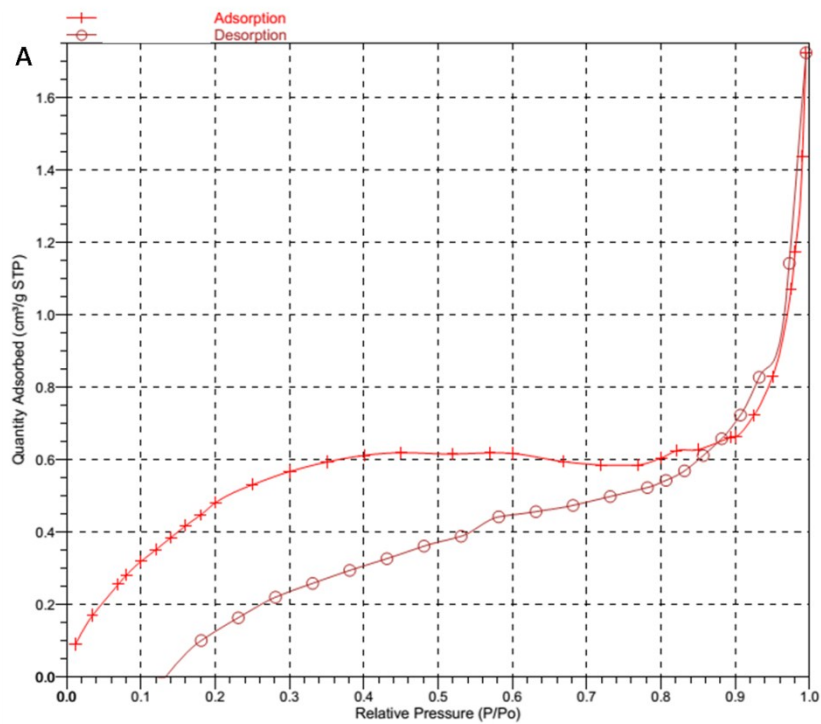

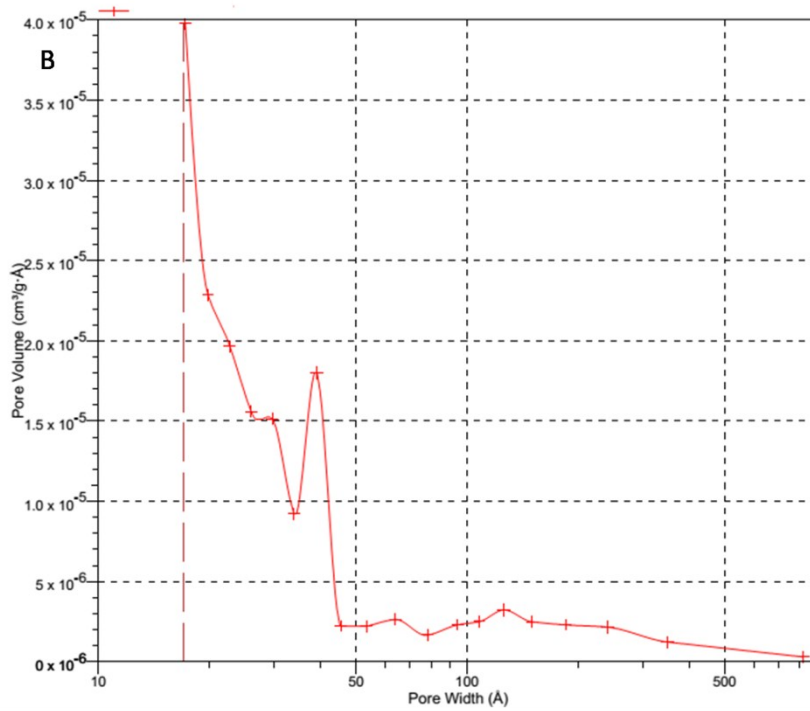

**Fig. S4** A) Nitrogen adsorption-desorption isotherms of CS@PGMA@IDA, (B) BJH pore-size distribution curve of CS@PGMA@IDA.

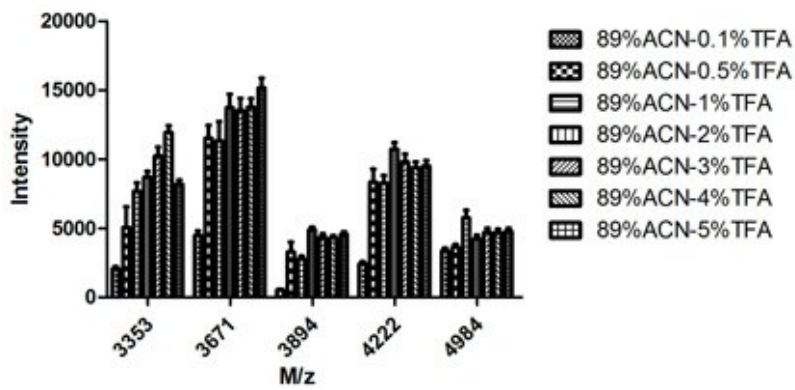

**Fig. S5** The influence of TFA IP on peak intensity of five chosen glycopeptides enriched by CS@PGMA@IDA nanospheres with four replicates.

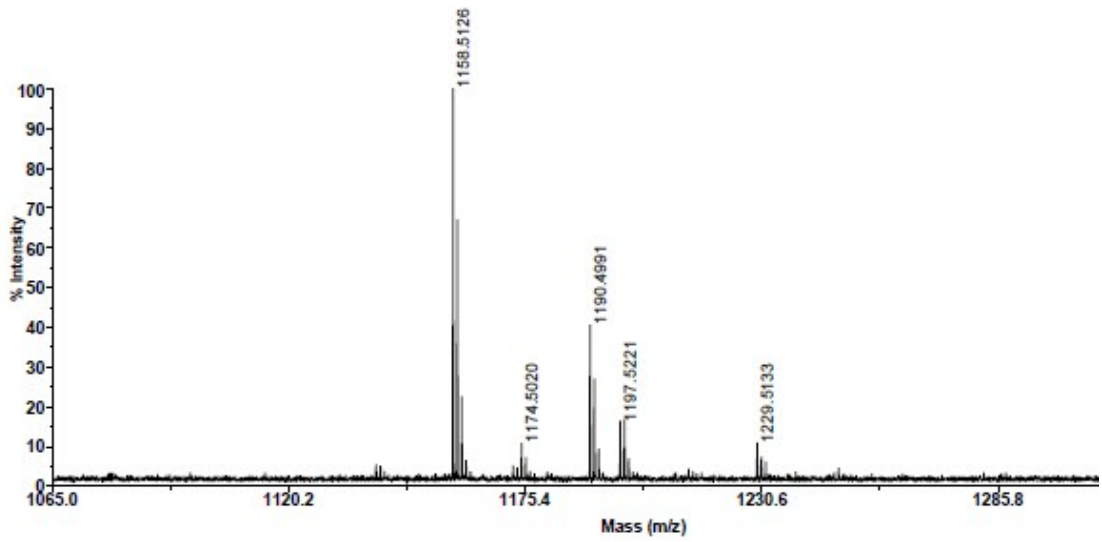

**Fig. S6** Human IgG digest after CS@PGMA@IDA enrichment and deglycosylation by PNGase F.

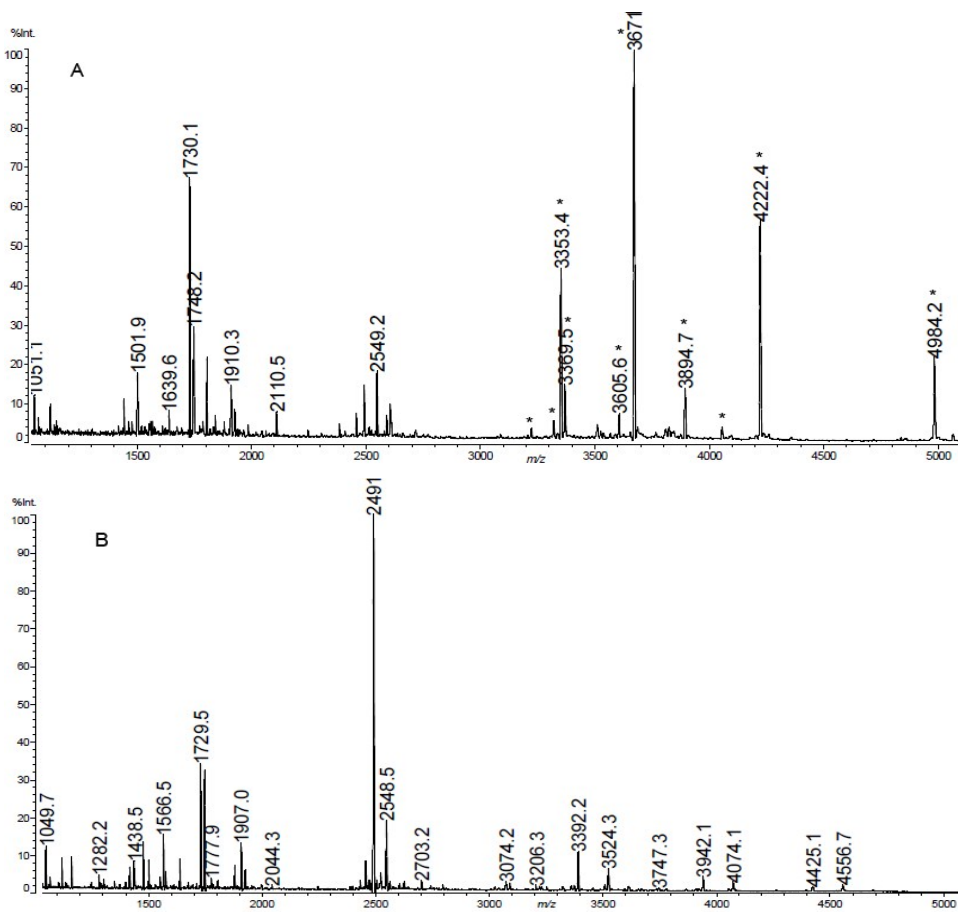

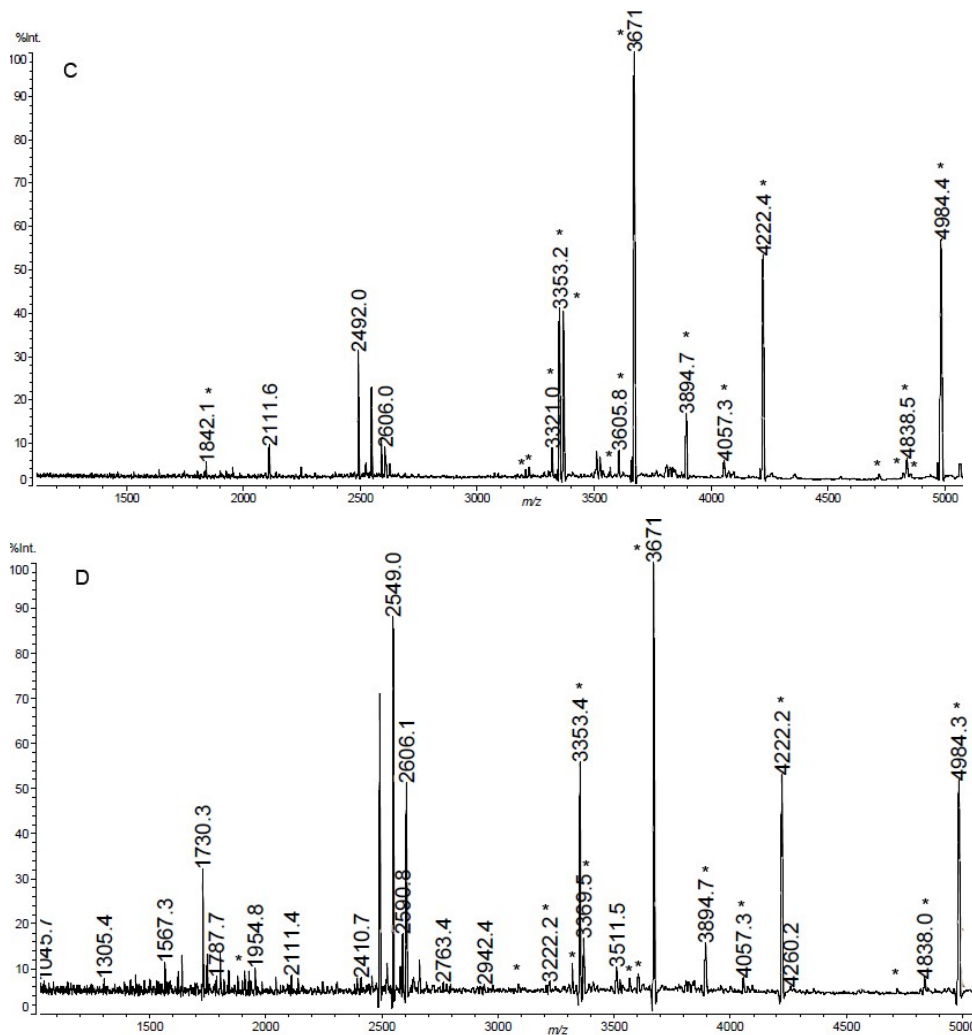

**Fig. S7** Optimization of the procedure for enrichment of glycopeptides using CS@PGMA@IDA nanospheres. MALDI mass spectra obtained from peptide mixture with the ratios of 1:100 enriched by CS@PGMA@IDA after washing three times with loading buffer (A), the eluate from washing with 85% ACN / 0.5 % H<sub>3</sub>PO<sub>4</sub> (B), and enriched by CS@PGMA@IDA after washing three times with loading buffer and 85% ACN / 0.5 % H<sub>3</sub>PO<sub>4</sub> one time (C), and enriched from peptide mixture with the ratios of 1:300 by CS@PGMA@IDA using the optimized procedure (D). The glycosylated peptides are marked with asterisks.

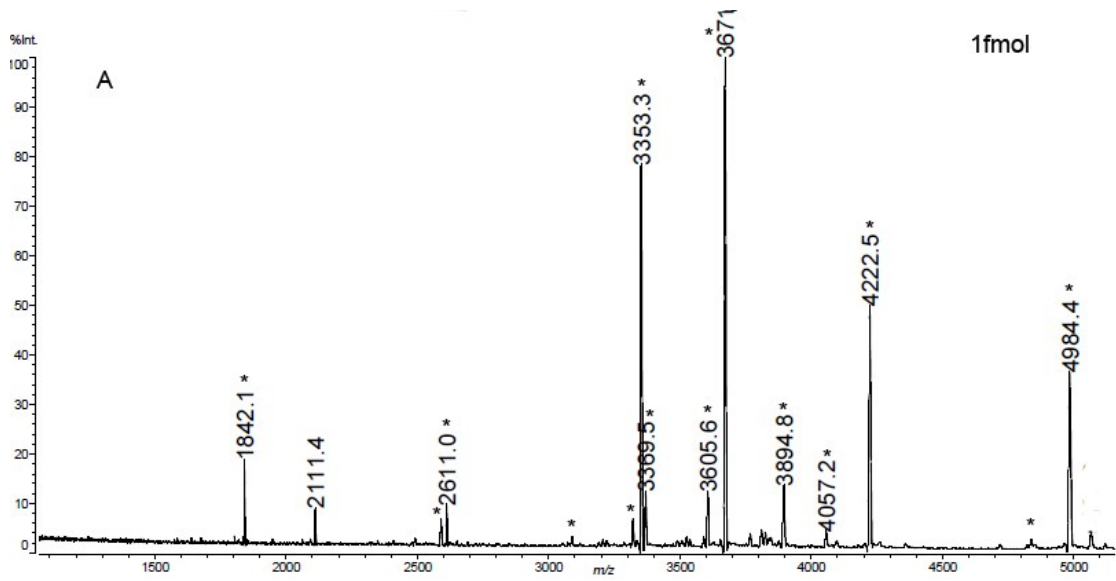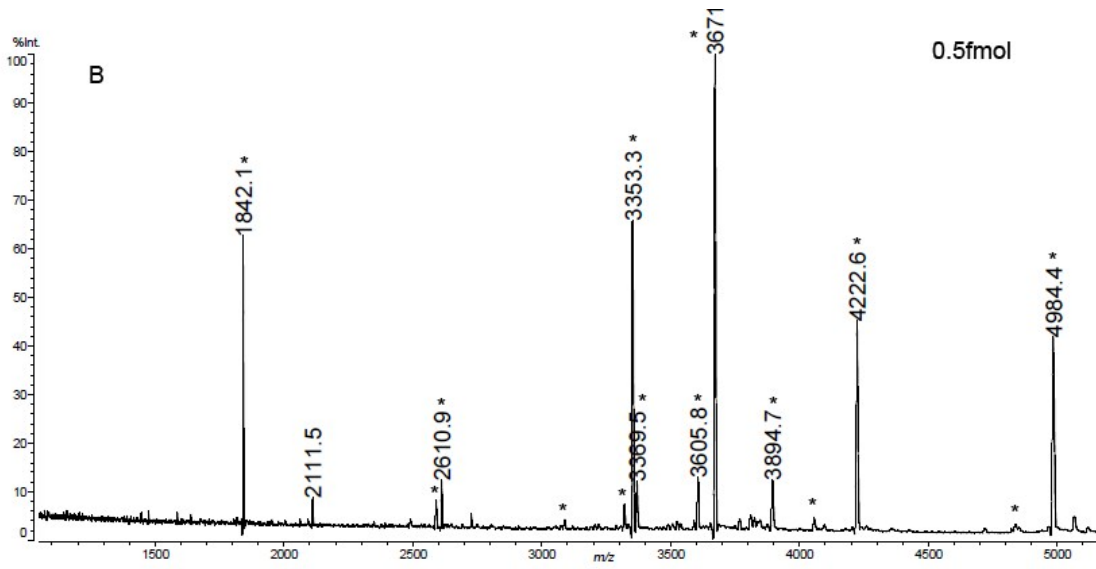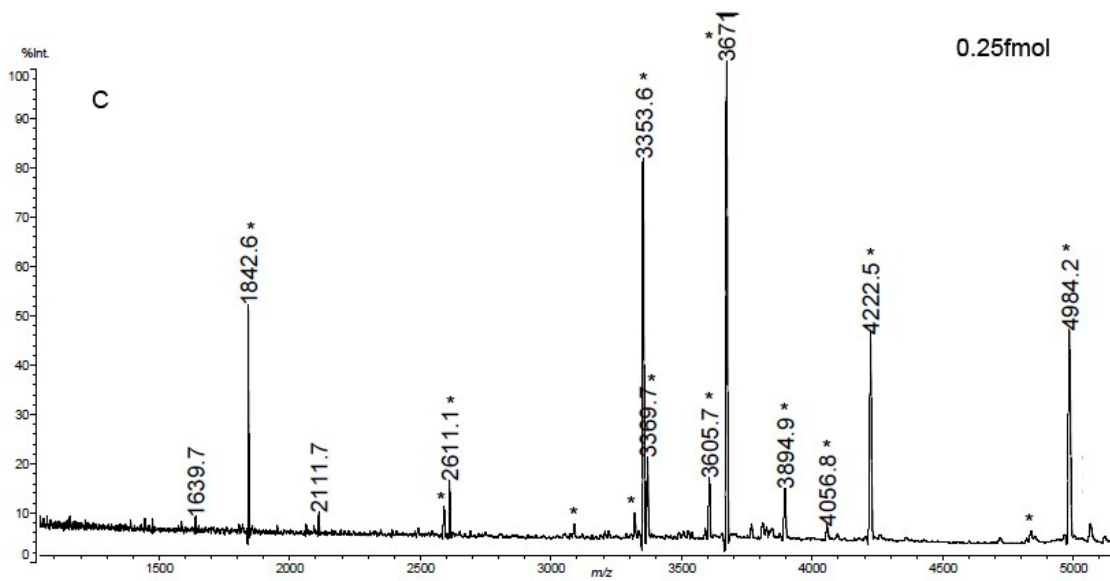

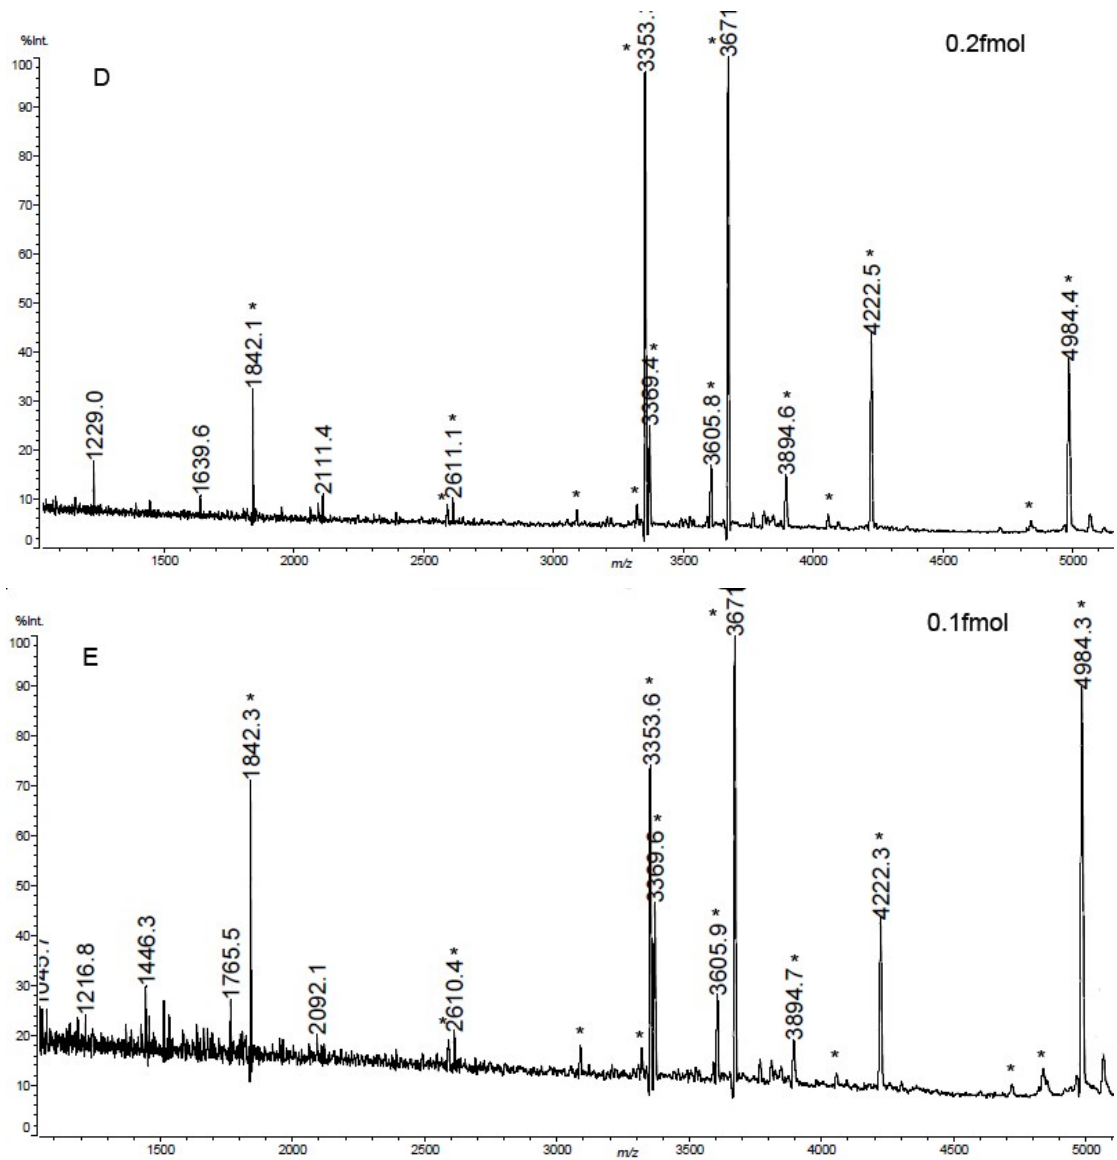

**Fig. S8** MALDI mass spectra of the enriched glycopeptides from HRP digest with the concentration of 1 fmol, 0.5 fmol, 0.25 fmol, 0.2 fmol and 0.1 fmol at different volume of 100  $\mu$ L, 200 $\mu$ L, 400 $\mu$ L, 500 $\mu$ L and 1000 $\mu$ L are shown in A, B, C, D, and E, respectively. The glycopeptides are marked with asterisks.

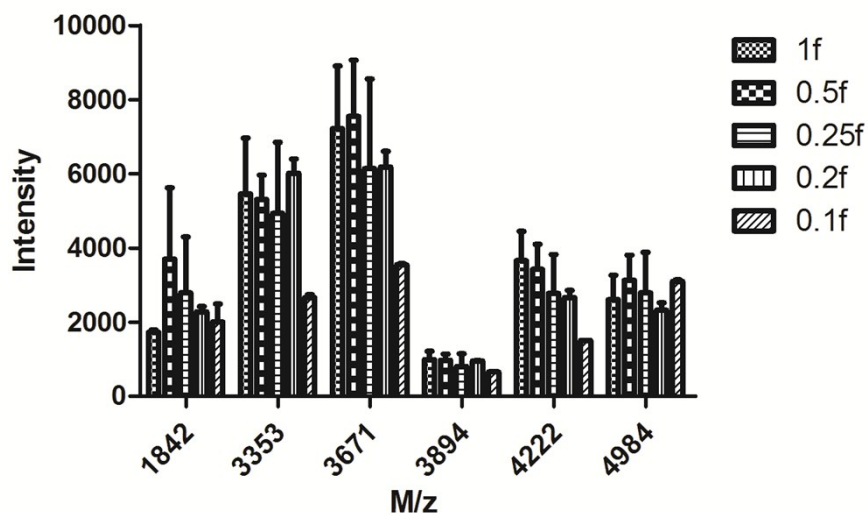

**Fig. S9** The influences of HRP digest concentration on peak intensity of six chosen glycopeptides enriched by CS@PGMA@IDA.

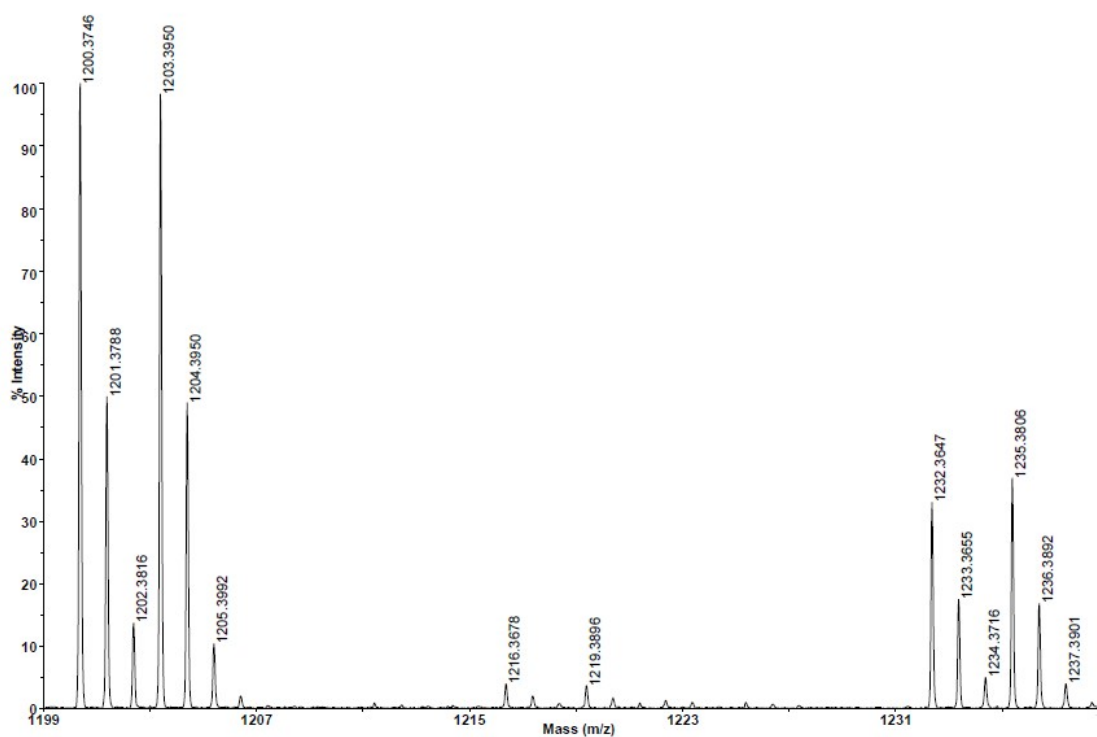

**Fig. S10** MALDI mass spectra of the recovery of the light- and heavy- acetylate labeling deglycosylated peptides of human IgG.

**Table S1. Elemental analysis of the title product**

| C% | H% | N% | $X_{\text{IDA unit}}^a$<br>[mmol mg <sup>-1</sup> ] |
|----|----|----|-----------------------------------------------------|
|----|----|----|-----------------------------------------------------|



|             |       |       |       |     |
|-------------|-------|-------|-------|-----|
| CS@PGMA     | 50.38 | 6.734 | 2.020 |     |
| CS@PGMA@IDA | 49.27 | 6.955 | 2.188 | 122 |

<sup>a</sup> The amount of IDA was obtained via a calculation based on the nitrogen content from the elemental analysis.

**Table S2. Zeta potential of CS@PGMA@IDA nanospheres in different binding buffer**

| Time    | 89%ACN-0.1%TFA  | 89%ACN-1%TFA    | 89%ACN-3%TFA    | 89%ACN-5%TFA    |
|---------|-----------------|-----------------|-----------------|-----------------|
| 1       | 0.089           | 0.09            | -0.193          | -0.024          |
| 2       | 0.0102          | 0.0918          | 0.169           | 0.0176          |
| 3       | -0.136          | 0.00526         | 0.127           | -0.216          |
| Average | -0.0123±0.11417 | 0.06235±0.04945 | 0.03433±0.19799 | -0.0741±0.12461 |

**Table S3: Detailed information of the glycopeptides enriched by CS@PGMA@IDA**

from HRP digest, N# denotes the N-linked glycosylation site.

| No. | Observed m/z | Glycan composition                         | Amino acid sequence       |
|-----|--------------|--------------------------------------------|---------------------------|
| H1  | 1842.3       | XylMan <sub>3</sub> FucGlcNAc <sub>2</sub> | NVGLN#R                   |
| H2  | 2532.8       | FucGlcNAc                                  | SFAN#STQTFNFAFVEAMDR      |
| H3  | 2590.8       | XylMan <sub>3</sub> FucGlcNAc <sub>2</sub> | PTLN#TTYLQTLR             |
| H4  | 2611.0       | XylMan <sub>3</sub> GlcNAc <sub>2</sub>    | MGN#ITPLTGTGQQR           |
| H5  | 3074.5       | FucGlcNAc                                  | LHFHDCFVNGCDASILLDN#TTSFR |
| H6  | 3088.1       | XylMan <sub>3</sub> FucGlcNAc <sub>2</sub> | GLCPLNGN#LSALVDFDLR       |
| H7  | 3191.1       | XylMan <sub>2</sub> FucGlcNAc <sub>2</sub> | SFAN#STQTFNFAFVEAMDR      |
| H8  | 3207.1       | XylMan <sub>3</sub> GlcNAc <sub>2</sub>    | SFAN#STQTFNFAFVEAMDR      |
| H9  | 3222.0       | Man <sub>3</sub> FucGlcNAc <sub>2</sub>    | SFAN#STQTFNFAFVEAMDR      |
| H10 | 3320.9       | XylMan <sub>3</sub> FucGlcNAc <sub>2</sub> | QLTPTFYDNPCPN#VSNIVR      |
| H11 | 3353.0       | XylMan <sub>3</sub> FucGlcNAc <sub>2</sub> | SFAN#STQTFNFAFVEAMDR      |
| H12 | 3369.6       | XylMan <sub>3</sub> FucGlcNAc <sub>2</sub> | SFAN#STQTFNFAFVEAM*DR     |
| H13 | 3508.7       | XylMan <sub>2</sub> FucGlcNAc <sub>2</sub> | GLIQSDQELFSSPN#ATDTIPLVR  |
| H14 | 3525.6       | XylMan <sub>3</sub> GlcNAc <sub>2</sub>    | GLIQSDQELFSSPN#ATDTIPLVR  |
| H15 | 3539.6       | Man <sub>3</sub> FucGlcNAc <sub>2</sub>    | GLIQSDQELFSSPN#ATDTIPLVR  |
| H16 | 3605.5       | XylMan <sub>3</sub> FucGlcNAc <sub>2</sub> | NQCRGLCPLNGN#LSALVDFDLR   |
| H17 | 3671.6       | XylMan <sub>3</sub> FucGlcNAc <sub>2</sub> | GLIQSDQELFSSPN#ATDTIPLVR  |

|     |        |                                                                                          |                                                  |
|-----|--------|------------------------------------------------------------------------------------------|--------------------------------------------------|
| H18 | 3894.6 | XylMan <sub>3</sub> FucGlcNAc <sub>2</sub>                                               | LHFHDCFVNGCDASILLDN#TTSFR                        |
| H19 | 4056.9 | XylMan <sub>3</sub> GlcNAc <sub>2</sub>                                                  | QLTPTFYDNSC(AAVESACPR)PN#VSNIVR-H <sub>2</sub> O |
| H20 | 4222.5 | XylMan <sub>3</sub> FucGlcNAc <sub>2</sub>                                               | QLTPTFYDNSC(AAVESACPR)PN#VSNIVR                  |
| H21 | 4720.1 | Man <sub>3</sub> FucGlcNAc <sub>2</sub><br>Man <sub>3</sub> FucGlcNAc <sub>2</sub>       | LYN#FSNTGLPDPTLN#TTYLQTLR                        |
| H22 | 4821.7 | XylMan <sub>2</sub> FucGlcNAc <sub>2</sub><br>XylMan <sub>2</sub> GlcNAc <sub>2</sub>    | LYN#FSNTGLPDPTLN#TTYLQTLR                        |
| H23 | 4838.2 | XylMan <sub>3</sub> FucGlcNAc <sub>2</sub><br>XylMan <sub>3</sub> GlcNAc <sub>2</sub>    | LYN#FSNTGLPDPTLN#TTYLQTLR                        |
| H24 | 4852.7 | Man <sub>3</sub> FucGlcNAc <sub>2</sub><br>XylMan <sub>3</sub> FucGlcNAc <sub>2</sub>    | LYN#FSNTGLPDPTLN#TTYLQTLR                        |
| H25 | 4984.3 | XylMan <sub>3</sub> FucGlcNAc <sub>2</sub><br>XylMan <sub>3</sub> FucGlcNAc <sub>2</sub> | LYN#FSNTGLPDPTLN#TTYLQTLR                        |

**Table S4. Detailed information of the glycopeptides enriched by CS@PGMA@IDA from human IgG digest. N# denotes the N-linked glycosylation site.**

| No. | Observed m/z | Glycan composition                        | Amino acid sequence       |
|-----|--------------|-------------------------------------------|---------------------------|
| I1  | 2237.4       | [Hex]3[HexNAc]2[Fuc]1                     | EEQFN#STFR                |
| I2  | 2268.8       | [Hex]3[HexNAc]2[Fuc]1                     | EEQYN#STYR                |
| I3  | 2398.8       | [Hex]3[HexNAc]3[Fuc]1                     | EEQFN#STFR                |
| I4  | 2414.6       | [Hex]3[HexNAc]3[Fuc]1                     | EEQFN#STYR                |
| I5  | 2431.5       | [Hex]3[HexNAc]3[Fuc]1                     | EEQYN#STYR                |
| I6  | 2456.4       | [Hex]3[HexNAc]4                           | EEQFN#STFR                |
| I7  | 2472.0       | [Hex]3[HexNAc]4                           | EEQFN#STYR                |
| I8  | 2488.4       | [Hex]3[HexNAc]4                           | EEQYN#STYR                |
| I9  | 2561.8       | [Hex]4[HexNAc]3[Fuc]1                     | EEQFN#STFR                |
| I10 | 2593.2       | [Hex]4[HexNAc]3[Fuc]1                     | EEQYN#STYR                |
| I11 | 2602.5       | [Hex]4[HexNAc]4[Fuc]1                     | EEQFN#STFR                |
| I12 | 2618.7       | [Hex]4[HexNAc]4[Fuc]1, or [Hex]4[HexNAc]4 | EEQFN#STYR, or EEQFN#STFR |

|     |        |                                           |                               |
|-----|--------|-------------------------------------------|-------------------------------|
| I13 | 2634.8 | [Hex]4[HexNAc]4[Fuc]1,or [Hex]4[HexNAc]4  | EEQYN#STYR, or<br>EEQFN#STYR, |
| I14 | 2650.9 | [Hex]4[HexNAc]4                           | EEQYN#STYR                    |
| I15 | 2660.1 | [Hex]3[HexNAc]5                           | EEQFN#STFR                    |
| I16 | 2674.8 | [Hex]3[HexNAc]5                           | EEQFN#STYR                    |
| I17 | 2691.9 | [Hex]3[HexNAc]5                           | EEQYN#STYR                    |
| I18 | 2765.0 | [Hex]4[HexNAc]4[Fuc]1                     | EEQFN#STFR                    |
| I19 | 2781.2 | [Hex]4[HexNAc]4[Fuc]1,or[Hex]5[HexNAc]4   | EEQFN#STYR, or<br>EEQFN#STFR  |
| I20 | 2797.2 | [Hex]4[HexNAc]4[Fuc]1,or[Hex]5[HexNAc]4   | EEQYN#STYR, or<br>EEQFN#STYR  |
| I21 | 2806.8 | [Hex]3[HexNAc]5[Fuc]1                     | EEQFN#STFR                    |
| I22 | 2822.7 | [Hex]3[HexNAc]5[Fuc]1, or [Hex]4[HexNAc]5 | EEQFN#STYR, or<br>EEQFN#STFR  |
| I23 | 2838.3 | [Hex]3[HexNAc]5[Fuc]1, or [Hex]4[HexNAc]5 | EEQYN#STYR or<br>EEQFN#STYR   |
| I24 | 2854.6 | [Hex]4[HexNAc]5                           | EEQYN#STYR                    |
| I25 | 2927.5 | [Hex]5[HexNAc]4[Fuc]1                     | EEQFN#STFR                    |
| I26 | 2943.6 | [Hex]5[HexNAc]4[Fuc]1                     | EEQFN#STYR                    |
| I27 | 2959.6 | [Hex]5[HexNAc]4[Fuc]1                     | EEQYN#STYR                    |
| I28 | 2969.0 | [Hex]4[HexNAc]5[Fuc]1                     | EEQFN#STFR                    |
| I29 | 2985.1 | [Hex]4[HexNAc]5[Fuc]1, or [Hex]5[HexNAc]5 | EEQFN#STYR,or<br>EEQFN#STFR   |
| I30 | 3002.5 | [Hex]4[HexNAc]5[Fuc]1,or[Hex]5[HexNAc]5   | EEQYN#STYR, or<br>EEQFN#STYR  |
| I31 | 3017.5 | [Hex]5[HexNAc]5                           | [Hex]5[HexNAc]5               |
| I32 | 3057.4 | [Hex]4[HexNAc]4[Fuc]1[NeuAc]1             | EEQFN#STFR                    |
| I33 | 3089.4 | [Hex]4[HexNAc]4[Fuc]1[NeuAc]1             | EEQYN#STYR                    |
| I34 | 3105.7 | [Hex]5[HexNAc]4 [NeuAc]1                  | EEQYN#STYR                    |
| I35 | 3131.2 | [Hex]5[HexNAc]5[Fuc]1                     | EEQFN#STFR                    |
| I36 | 3162.9 | [Hex]5[HexNAc]5[Fuc]1                     | EEQYN#STYR                    |
| I37 | 3219.5 | [Hex]5[HexNAc]4[Fuc]1[NeuAc]1             | EEQFN#STFR                    |
| I38 | 3235.9 | [Hex]5[HexNAc]4[Fuc]1[NeuAc]1             | EEQFN#STYR                    |
| I39 | 3251.7 | [Hex]5[HexNAc]4[Fuc]1[NeuAc]1             | EEQYN#STYR                    |

**Table S5. Recovery of three deglycosylated peptides from human IgG digest by using CS@PGMA@IDA**

| Ratio(%) | EEQFN#STYR | EEQFN#STFR | EEQYN#STYR |
|----------|------------|------------|------------|
| D/H      | 99.5       | 106.7      | 99.1       |
| D/H      | 93.3       | 99.3       | 105.7      |
| D/H      | 95.2       | 92.6       | 103.7      |

Average recovery 96±3.16  
± S. D

102.8±7.06

99.5±3.43

**Table S6. Identified N-glycopeptides containing deamidated Asn within N-X-S/T from 1 1µL human serum digest. N# denotes the N-linked glycosylation site. The total of LC-MS/MS run time is 120mins. (c denotes Carbamidomethyl; n and q denote Deamidated; m denotes Oxidation).**

| No. | Protein Group Accessions | Description                                                                                                | Sequence                                                                           |
|-----|--------------------------|------------------------------------------------------------------------------------------------------------|------------------------------------------------------------------------------------|
| 1   | X6RLJ0                   | Complement C1q subcomponent subunit A (Fragment) OS=Homo sapiens GN=C1QA PE=4 SV=1 - [X6RLJ0_HUMAN]        | RNPPmGGNVVIFDVTITNQEOPYQN#HSGR<br>RNPPmGGNVVIFDVTITnQEOPYQN#HSGR                   |
| 2   | B1AHM6                   | Fibulin-1 (Fragment) OS=Homo sapiens GN=FBLN1 PE=4 SV=1 - [B1AHM6_HUMAN]                                   | cATPHGDN#ASLEATFVK                                                                 |
| 3   | Q9Y5Y7                   | Lymphatic vessel endothelial hyaluronic acid receptor 1 OS=Homo sapiens GN=LYVE1 PE=1 SV=2 - [LYVE1_HUMAN] | KANQQLN#FTEAK<br>ANQQLN#FTEAK                                                      |
| 4   | Q9UK55                   | Protein Z-dependent protease inhibitor OS=Homo sapiens GN=SERPINA10 PE=1 SV=1 - [ZPI_HUMAN]                | ETFFN#LSK                                                                          |
| 5   | Q9UGM5-2                 | Isoform 2 of Fetuin-B OS=Homo sapiens GN=FETUB - [FETUB_HUMAN]                                             | VLYLAAYN#cTLRPVSK                                                                  |
| 6   | Q9HDC9-2                 | Isoform 2 of Adipocyte plasma membrane-associated protein OS=Homo sapiens GN=APMAP - [APMAP_HUMAN]         | AGPN#GTLFVADAYK                                                                    |
| 7   | Q96PD5                   | N-acetylmuramoyl-L-alanine amidase OS=Homo sapiens GN=PGLYRP2 PE=1 SV=1 - [PGRP2_HUMAN]                    | LEPVHLQLQcmSQEQLAQVAAN#ATK<br>LEPVHLQLQcMSQEQLAQVAAN#ATK<br>GFGVAIVGN#YTAALPTEAALR |
| 8   | Q96IY4-2                 | Isoform 2 of Carboxypeptidase B2 OS=Homo sapiens GN=CPB2 - [CBPB2_HUMAN]                                   | KQVHFFVN#ASDVDNVK<br>QVHFFVN#ASDVDNVK                                              |
| 9   | Q8WUT4                   | Leucine-rich repeat neuronal protein                                                                       | AFAcFPALqLLN#LScTALGR                                                              |

|    |          |                                                                                                               |                                                                                                              |
|----|----------|---------------------------------------------------------------------------------------------------------------|--------------------------------------------------------------------------------------------------------------|
|    |          | 4 OS=Homo sapiens GN=LRRN4 PE=1 SV=3 - [LRRN4_HUMAN]                                                          |                                                                                                              |
| 10 | Q7Z7M0-2 | Isoform 2 of Multiple epidermal growth factor-like domains protein 8 OS=Homo sapiens GN=MEGF8 - [MEGF8_HUMAN] | LTcEDcLAN#SSqcAWcQSTHTcFLFAAYLAR                                                                             |
| 11 | Q7Z2Y8   | Interferon-induced very large GTPase 1 OS=Homo sapiens GN=GVINP1 PE=2 SV=2 - [GVIN1_HUMAN]                    | DNELVTFVIGLAN#LTLINIFGENPSEMQDIL QIVVQAFLRMK                                                                 |
| 12 | Q7L4P6-2 | Isoform 2 of BEN domain-containing protein 5 OS=Homo sapiens GN=BEND5 - [BEND5_HUMAN]                         | YlcekImDIN#K                                                                                                 |
| 13 | Q6UXB8   | Peptidase inhibitor 16 OS=Homo sapiens GN=PI16 PE=1 SV=1 - [PI16_HUMAN]                                       | SLPNFPN#TSATAN#ATGGR                                                                                         |
| 14 | Q6EMK4   | Vasorin OS=Homo sapiens GN=VASN PE=1 SV=1 - [VASN_HUMAN]                                                      | LHEITN#ETFR                                                                                                  |
| 15 | Q5VVQ7   | C4b-binding protein beta chain (Fragment) OS=Homo sapiens GN=C4BPB PE=4 SV=1 - [Q5VVQ7_HUMAN]                 | EWDN#TTTEcR<br>LGHcPDPVLVNGEFSSSGPV N#VSDK<br>LGHcPDPVLVnGEFSSSGPVN#VSDK                                     |
| 16 | Q5T985   | Inter-alpha-trypsin inhibitor heavy chain H2 OS=Homo sapiens GN=ITIH2 PE=1 SV=1 - [Q5T985_HUMAN]              | GAFISN#FSmTVDGK<br>GAFISN#FSMTVDGK                                                                           |
| 17 | Q5SSB9   | Ficolin-3 OS=Homo sapiens GN=FCN3 PE=4 SV=1 - [Q5SSB9_HUMAN]                                                  | VELEDFNGN#R<br>VELEDFnGN#R                                                                                   |
| 18 | Q5SQ12   | Prostaglandin-H2 D-isomerase OS=Homo sapiens GN=PTGDS PE=3 SV=1 - [Q5SQ12_HUMAN]                              | SVVAPATDGGLN#LTSTFLR                                                                                         |
| 19 | Q5H9B4   | Metalloproteinase inhibitor 1 (Fragment) OS=Homo sapiens GN=TIMP1 PE=1 SV=2 - [Q5H9B4_HUMAN]                  | FVGTPEVN#QTTLYQR                                                                                             |
| 20 | Q16609   | Putative apolipoprotein(a)-like protein 2 OS=Homo sapiens GN=LPAL2 PE=5 SV=1 - [LPAL2_HUMAN]                  | WEYcN#LTR                                                                                                    |
| 21 | Q14624-4 | Isoform 4 of Inter-alpha-trypsin inhibitor heavy chain H4 OS=Homo sapiens GN=ITIH4 - [ITIH4_HUMAN]            | KAFIT N#FSmIIDGmTYPGIK<br>KAFIT N#FSMIIDGmTYPGIK<br>AFIT N#FSmIIDGmTYPGIK<br>NQALN#LSLAYSFVTPLTSMVVTKPDDQEQS |

|    |          |                                                                                                                                   |                                                                                             |
|----|----------|-----------------------------------------------------------------------------------------------------------------------------------|---------------------------------------------------------------------------------------------|
|    |          |                                                                                                                                   | QVAEKpMEGESR<br>AFIT N#FSMIIDGmTYPGIK                                                       |
| 22 | Q08380   | Galectin-3-binding protein<br>OS=Homo sapiens GN=LGALS3BP<br>PE=1 SV=1 - [LG3BP_HUMAN]                                            | GL N#LTEDTYKPR<br>EPGS N#VTmSVDAEcVPmVR<br>ALGFE N#ATQALGR<br>TVIRPFYLTN#SSGVD              |
| 23 | Q06033-2 | Isoform 2 of Inter-alpha-trypsin<br>inhibitor heavy chain H3 OS=Homo<br>sapiens GN=ITIH3 - [ITIH3_HUMAN]                          | NAHGEEKEN#LTAR<br>nAHGEEKEN#LTAR                                                            |
| 24 | Q04756   | Hepatocyte growth factor activator<br>OS=Homo sapiens GN=HGFA PE=1<br>SV=1 - [HGFA_HUMAN]                                         | DSVSVVLGQHFFN#R                                                                             |
| 25 | Q03591   | Complement factor H-related<br>protein 1 OS=Homo sapiens<br>GN=CFHR1 PE=1 SV=2 -<br>[FHR1_HUMAN]                                  | LQNNENN#IScVER                                                                              |
| 26 | P80188   | Neutrophil gelatinase-associated<br>lipocalin OS=Homo sapiens<br>GN=LCN2 PE=1 SV=2 -<br>[NGAL_HUMAN]                              | SYN#VTSVLFR                                                                                 |
| 27 | P55058   | Phospholipid transfer protein<br>OS=Homo sapiens GN=PLTP PE=1<br>SV=1 - [PLTP_HUMAN]                                              | VSN#VScQASVSR<br>GKEGHFYFN#ISEVK<br>N#WSLPNR<br>EGHFYFN#ISEVK                               |
| 28 | P51884   | Lumican OS=Homo sapiens GN=LUM<br>PE=1 SV=2 - [LUM_HUMAN]                                                                         | LHINHNN#LTESVGPLPK<br>LHINHnN#LTESVGPLPK<br>LGSFEGLVN#LTFIHLQHNR<br>AFEN#VTDLQWLILDHNLLENSK |
| 29 | P49917   | DNA ligase 4 OS=Homo sapiens<br>GN=LIG4 PE=1 SV=2 -<br>[DNLI4_HUMAN]                                                              | APN#LTNVNK                                                                                  |
| 30 | P43652   | Afamin OS=Homo sapiens GN=AFM<br>PE=1 SV=1 - [AFAM_HUMAN]                                                                         | HN#FSHccSK<br>YAEDKFN#ETTEK<br>DIENFN#STQK                                                  |
| 31 | P40197   | Platelet glycoprotein V OS=Homo<br>sapiens GN=GP5 PE=1 SV=1 -<br>[GPV_HUMAN]                                                      | LLDLSGNN#LTHLPK                                                                             |
| 32 | P35858   | Insulin-like growth factor-binding<br>protein complex acid labile subunit<br>OS=Homo sapiens GN=IGFALS PE=1<br>SV=1 - [ALS_HUMAN] | AGAFLGLTNVAVmN#LSGNcLR                                                                      |
| 33 | P29622   | Kallistatin OS=Homo sapiens<br>GN=SERPINA4 PE=1 SV=3 -                                                                            | FLN#DTmAVYEAK<br>DFYVDEN#TTVR                                                               |

|    |                   |                                                                                           |                                                                                                                                                                                                                                                                                              |
|----|-------------------|-------------------------------------------------------------------------------------------|----------------------------------------------------------------------------------------------------------------------------------------------------------------------------------------------------------------------------------------------------------------------------------------------|
|    |                   | [KAIN_HUMAN]                                                                              | SQILEGLGFN#LTELSESDVHR                                                                                                                                                                                                                                                                       |
| 34 | P22792            | Carboxypeptidase N subunit 2<br>OS=Homo sapiens GN=CPN2 PE=1<br>SV=3 - [CPN2_HUMAN]       | AFGSNPN#LTK<br>LYLGSNN#LTALHPALFQN#LSK<br>LEDLEVTGSSFLN#LSTnIFSNLTSLGK                                                                                                                                                                                                                       |
| 35 | P20742            | Pregnancy zone protein OS=Homo<br>sapiens GN=PZP PE=1 SV=4 -<br>[PZP_HUMAN]               | TFSSmTcASGAN#VSEQLSLK                                                                                                                                                                                                                                                                        |
| 36 | P19652            | Alpha-1-acid glycoprotein 2<br>OS=Homo sapiens GN=ORM2 PE=1<br>SV=2 - [A1AG2_HUMAN]       | EN#GTVSR<br>QNQcFYn#SSYLNvQR<br>QnQcFYn#SSYLNvQR                                                                                                                                                                                                                                             |
| 37 | P14151            | L-selectin OS=Homo sapiens<br>GN=SELL PE=1 SV=2 -<br>[LYAM1_HUMAN]                        | FcRDN#YTDLVAIQNK<br>IGGIWTWVGTN#K                                                                                                                                                                                                                                                            |
| 38 | P12259            | Coagulation factor V OS=Homo<br>sapiens GN=F5 PE=1 SV=4 -<br>[FA5_HUMAN]                  | NSVLN#SSTAETHSSPYSEDPIEDPLQPDVTGI<br>R                                                                                                                                                                                                                                                       |
| 39 | P10909-4          | Isoform 4 of Clusterin OS=Homo<br>sapiens GN=CLU - [CLUS_HUMAN]                           | HN#STGcLR<br>EDALN#ETR<br>LAN#LTQGEDQYYLR<br>LkELPGVcN#ETmmALWEEcKpCLK<br>ELPGVcN#ETmmALWEEcKpCLK<br>ELPGVcN#ETMmALWEEcKpCLK<br>LkELPGVcN#ETMmALWEEcKpCLK<br>LkELPGVcN#ETMMALWEEcKpCLK<br>ELPGVcN#ETMMALWEEcKpCLK<br>QLEEFln#QSSPFYFWmnGDR<br>mLn#TSSLLEQLNEQFNWVSR<br>MLN#TSSLLEQLNEQFNWVSR |
| 40 | POC0L5            | Complement C4-B OS=Homo sapiens<br>GN=C4B PE=1 SV=2 -<br>[CO4B_HUMAN]                     | GLN#VTLSTGR<br>FSDGLESN#SSTQFEVKK<br>FSDGLESN#SSTQFEVK<br>TYNVLDmKN#TTcQDLQIEVTVK<br>TYNVLDmKN#TTcqDLQIEVTVK                                                                                                                                                                                 |
| 41 | P08603;Q0<br>3591 | Complement factor H OS=Homo<br>sapiens GN=CFH PE=1 SV=4 -<br>[CFAH_HUMAN]                 | SPYEmFGDEEVmclnGN#WTEPPQcK<br>ISEEN#ETTcYmGK<br>mDGASN#VTcINSR<br>ISEEN#ETTcYMGK<br>IPcSQPPQIEHGtIN#SSR                                                                                                                                                                                      |
| 42 | P08185            | Corticosteroid-binding globulin<br>OS=Homo sapiens GN=SERPINA6<br>PE=1 SV=1 - [CBG_HUMAN] | AQLLQGLGFN#LTER<br>AVLQLNEEGVDtAGSTGVTLN#LTSKPIILR<br>AVLQLnEEGVDTAGSTGVTLN#LTSKPIILR<br>VTISGVYDLGDVLEEmGIADLFTNQAN#FSR                                                                                                                                                                     |
| 43 | P07996            | Thrombospondin-1 OS=Homo                                                                  | VVN#STTGpGEHLR                                                                                                                                                                                                                                                                               |

|    |        |                                                                                             |                                                                                                                                                                                                                                  |
|----|--------|---------------------------------------------------------------------------------------------|----------------------------------------------------------------------------------------------------------------------------------------------------------------------------------------------------------------------------------|
|    |        | sapiens GN=THBS1 PE=1 SV=2 - [TSP1_HUMAN]                                                   |                                                                                                                                                                                                                                  |
| 44 | P07357 | Complement component C8 alpha chain OS=Homo sapiens GN=C8A PE=1 SV=2 - [CO8A_HUMAN]         | GGSSGWSGGLAQN#R                                                                                                                                                                                                                  |
| 45 | P05546 | Heparin cofactor 2 OS=Homo sapiens GN=SERPIND1 PE=1 SV=3 - [HEP2_HUMAN]                     | DFVN#ASSK<br>GETHEQVHSILHFKDFVN#ASSK<br>GETHEqVHSILHFKDFVN#ASSK<br>N#LSmPLLPA DFHK<br>GGETAQSADPQWEQLNNKN#LSmPLLPA D<br>FHK<br>GGETAQSADPQWEQLNnKN#LSmPLLPA D<br>HK                                                              |
| 46 | P05543 | Thyroxine-binding globulin OS=Homo sapiens GN=SERPINA7 PE=1 SV=2 - [THBG_HUMAN]             | VTAcHSSQPN#ATLYK<br>TLYETE VFSTDFSN#ISA AK                                                                                                                                                                                       |
| 47 | P05154 | Plasma serine protease inhibitor OS=Homo sapiens GN=SERPINA5 PE=1 SV=3 - [IPSP_HUMAN]       | VVGVPYQGN#ATALFILPSEGK                                                                                                                                                                                                           |
| 48 | P04275 | von Willebrand factor OS=Homo sapiens GN=VWF PE=1 SV=4 - [VWF_HUMAN]                        | mEAcmLN#GTVIGPGK                                                                                                                                                                                                                 |
| 49 | P04220 | Ig mu heavy chain disease protein OS=Homo sapiens PE=1 SV=1 - [MUCB_HUMAN]                  | THTNISESHPN#ATFSAVGEASicEDDWD SG<br>ER<br>THTN#ISESHPNATFSAVGEASicEDDWD SG<br>R                                                                                                                                                  |
| 50 | P04217 | Alpha-1B-glycoprotein OS=Homo sapiens GN=A1BG PE=1 SV=4 - [A1BG_HUMAN]                      | EGDHEFLEVPEAQEDVEATFPVHQPGN#YSc<br>SYR<br>EGDHEFLEVPEAqEDVEATFPVHQPGN#YSc<br>SYR<br>EGDHEFLEVPEAqEDVEATFPVHqPGnYScSY<br>R<br>FQSPAGTEALFELHnISVADSAN#YScVYVDL<br>KPPFGGSAPSER<br>FqSPAGTEALFELHN#ISVADSAnYScVYVDL<br>PPFGGSAPSER |
| 51 | P04196 | Histidine-rich glycoprotein OS=Homo sapiens GN=HRG PE=1 SV=1 - [HRG_HUMAN]                  | VIDFN#cTTSSVSSALAnTK<br>VIDFN#cTTSSVSSALANTK                                                                                                                                                                                     |
| 52 | P04180 | Phosphatidylcholine-sterol acyltransferase OS=Homo sapiens GN=LCAT PE=1 SV=1 - [LCAT_HUMAN] | AELSN#HTRPVILVPGcLGNQLEAK                                                                                                                                                                                                        |
| 53 | P04114 | Apolipoprotein B-100 OS=Homo                                                                | FVEGSHN#STVSLTTK                                                                                                                                                                                                                 |



|    |           |                                                                                          |                                                                                                                                                                                                                                                                                                                                                                        |
|----|-----------|------------------------------------------------------------------------------------------|------------------------------------------------------------------------------------------------------------------------------------------------------------------------------------------------------------------------------------------------------------------------------------------------------------------------------------------------------------------------|
|    |           | sapiens GN=APOB PE=1 SV=2 -<br>[APOB_HUMAN]                                              | FN#SSYLQGTnQITGR<br>FN#SSYLQGTnQITGR<br>YDFN#SSmLYSTAK<br>SKPTVSSSmEFKYDFN#SSmLYSTAK<br>VNQNLVYESGSLN#FSK<br>VNQNLVYESGSLN#FSKLEIQSQVDSQHVGH<br>SVLTAK<br>QVFLDVTYGN#cSTHFTVK<br>qVFLDVTYGN#cSTHFTVK<br>FEVDSPVYN#ATWSASLK<br>TIHDLHLFIENIDFN#K<br>ELcTISHIFIPAmGN#ITYDFSFK<br>YNQN#FSAGNnEnImEAHVINGEANLDFL<br>NIPLTIPEmR<br>SSVITLNTNAELFN#qSDIVAHLLSSSSVIDAL<br>QYK |
| 54 | P04004    | Vitronectin OS=Homo sapiens<br>GN=VTN PE=1 SV=1 -<br>[VTNC_HUMAN]                        | NN#ATVHEQVGGPSLTSDLQAQSK<br>nN#ATVHEQVGGPSLTSDLQAQSK<br>N#GSLFAFR<br>N#ISDGFDPDnVDAALALPAHSYSGR<br>FEDGVLDPDYPRN#ISDGFDPDNVDAALA<br>LPAHSYSGR                                                                                                                                                                                                                          |
| 55 | P04003    | C4b-binding protein alpha chain<br>OS=Homo sapiens GN=C4BPA PE=1<br>SV=2 - [C4BPA_HUMAN] | LSVDKdQYVEPENVTIQcDSGYGVVGPQSITc<br>SGnR<br>LSVDKdQYVEPEN#VTIQcDSGYGVVGPQSIT<br>cSGnR<br>FSLLGHASIScTVEN#ETIGVWRPSPPTcEK                                                                                                                                                                                                                                               |
| 56 | P03951-2  | Isoform 2 of Coagulation factor XI<br>OS=Homo sapiens GN=F11 -<br>[FA11_HUMAN]           | LETTVN#YTDSQRPIcLPSK                                                                                                                                                                                                                                                                                                                                                   |
| 57 | P02790    | Hemopexin OS=Homo sapiens<br>GN=HPX PE=1 SV=2 -<br>[HEMO_HUMAN]                          | GHGHRN#GTGHGN#STHHGPEYmR<br>N#GTGHGN#STHHGPEYmR<br>SWPAVGN#cSSALR<br>ALPQPQN#VTSLLGcTH<br>cSDGWSFDATTLLDDN#GTmLFFK<br>cSDGWSFDATTLLDDN#GTmLFFK                                                                                                                                                                                                                         |
| 58 | P02787    | Serotransferrin OS=Homo sapiens<br>GN=TF PE=1 SV=3 - [TRFE_HUMAN]                        | cGLVPVLAENYN#K<br>cGLVPVLAEnYN#K<br>QQQHFLFGSN#VTDcSGNFcLFR<br>QQQHFLFGSN#VTDcSGNFcLFR                                                                                                                                                                                                                                                                                 |
| 59 | P02765    | Alpha-2-HS-glycoprotein OS=Homo<br>sapiens GN=AHSG PE=1 SV=1 -<br>[FETUA_HUMAN]          | AALAAFNAQnN#GSNFQLEEISR                                                                                                                                                                                                                                                                                                                                                |
| 60 | P02763;P1 | Alpha-1-acid glycoprotein 1                                                              | NEEYN#K                                                                                                                                                                                                                                                                                                                                                                |

|    |               |                                                                                    |                                                                                                                                                                                                                                                                        |
|----|---------------|------------------------------------------------------------------------------------|------------------------------------------------------------------------------------------------------------------------------------------------------------------------------------------------------------------------------------------------------------------------|
|    | 9652          | OS=Homo sapiens GN=ORM1 PE=1 SV=1 - [A1AG1_HUMAN]                                  | SVQEIQATFFYFTPN#K<br>SVQEIQATFFYFTPN#KTEDTIFLR<br>NEEYNKSVqEIQATFFYFTPN#KTEDTIFLR<br>EN#GTISR<br>QDQcIYN#TTYLnVQR<br>QDQcIYN#TTYLNVQR                                                                                                                                  |
| 61 | P02751-10     | Isoform 10 of Fibronectin OS=Homo sapiens GN=FN1 - [FINC_HUMAN]                    | RHEEGHmLN#cTcFGQGR<br>HEEGHmLN#cTcFGQGR<br>HEEGHMLN#cTcFGQGR<br>DQcIVDDITYNVN#DTFHKR<br>DQcIVDDITYNVN#DTFHK<br>LDAPTNLQFVN#ETDSTVLVR<br>LDAPTNLqFVN#ETDSTVLVR                                                                                                          |
| 61 | P02750        | Leucine-rich alpha-2-glycoprotein OS=Homo sapiens GN=LRG1 PE=1 SV=2 - [A2GL_HUMAN] | mFSQN#DTR<br>KLPPGLLAN#FTLLR<br>LPPGLLAN#FTLLR<br>SDHGSSIScQPPAEIPGYLPADTVHLAVEFFN<br>#LTHLPANLLQGASK                                                                                                                                                                  |
| 62 | P02749        | Beta-2-glycoprotein 1 OS=Homo sapiens GN=APOH PE=1 SV=3 - [APOH_HUMAN]             | VYKPSAGN#NSLYR<br>VYKPSAGN#nSLYR<br>LGN#WSAMPScK<br>DTAVFEcLPQHAmFGnDTITcTTHGN#WTK                                                                                                                                                                                     |
| 63 | P02748        | Complement component C9 OS=Homo sapiens GN=C9 PE=1 SV=2 - [CO9_HUMAN]              | AVN#ITSENLIDDVSLIR                                                                                                                                                                                                                                                     |
| 64 | P02743        | Serum amyloid P-component OS=Homo sapiens GN=APCS PE=1 SV=2 - [SAMP_HUMAN]         | ESVTDHVNLITPLEKPLQN#FTLcFR<br>ESVTDHVnLITPLEKPLQN#FTLcFR                                                                                                                                                                                                               |
| 65 | P01876;P01877 | Ig alpha-1 chain C region OS=Homo sapiens GN=IGHA1 PE=1 SV=2 - [IGHA1_HUMAN]       | LSLHRPALEDLLLGSEAN#LTcTLTGLR<br>LAGKPTHVN#VSVVmAEVDGTcY<br>LAGKPTHVN#VSVVMAEVDGTcY                                                                                                                                                                                     |
| 66 | P01871;P04220 | Ig mu chain C region OS=Homo sapiens GN=IGHM PE=1 SV=3 - [IGHM_HUMAN]              | STGKPTLYN#VSLVmSDTAGTcY<br>STGKPTLYN#VSLVMSD TAGTcY<br>YKN#NSDISSTR<br>YKN#nSDISSTR<br>GLTFQQN#ASSmcVPDQD TAIR<br>GLTFqQN#ASSmcVPDQD TAIR<br>THTN#ISESHPN#ATFSAVGEASicEDDWNS<br>GER<br>THTN#ISESHPN#ATFSAVGEASicEDDWnSG<br>ER<br>THTN#ISESHPNATFSAVGEASicEDDWNSG<br>ER |

|    |          |                                                                                    |                                                                                                                                                                                                                                                                                  |
|----|----------|------------------------------------------------------------------------------------|----------------------------------------------------------------------------------------------------------------------------------------------------------------------------------------------------------------------------------------------------------------------------------|
|    |          |                                                                                    | GLTFQQN#ASSMcVPDQDPAIR                                                                                                                                                                                                                                                           |
| 67 | P01861   | Ig gamma-4 chain C region<br>OS=Homo sapiens GN=IGHG4 PE=1<br>SV=1 - [IGHG4_HUMAN] | EEQFN#STYR                                                                                                                                                                                                                                                                       |
| 68 | P01860   | Ig gamma-3 chain C region<br>OS=Homo sapiens GN=IGHG3 PE=1<br>SV=2 - [IGHG3_HUMAN] | EEQYN#STFR                                                                                                                                                                                                                                                                       |
| 69 | P01859   | Ig gamma-2 chain C region<br>OS=Homo sapiens GN=IGHG2 PE=1<br>SV=2 - [IGHG2_HUMAN] | TKPREEQFN#STFR<br>EEQFN#STFR                                                                                                                                                                                                                                                     |
| 70 | P01857   | Ig gamma-1 chain C region<br>OS=Homo sapiens GN=IGHG1 PE=1<br>SV=1 - [IGHG1_HUMAN] | TKPREEQYN#STYR<br>EEQYN#STYR                                                                                                                                                                                                                                                     |
| 71 | P01042-2 | Isoform LMW of Kininogen-1<br>OS=Homo sapiens GN=KNG1 -<br>[KNG1_HUMAN]            | ITYSIVQTN#cSK<br>YNSQN#QSNNQFVLYR<br>YnSQN#QSNNQFVLYR<br>YnSQN#QSnNQFVLYR<br>HGIQYFNN#NTQHSSLFmLNEVKR<br>LNAEnN#ATFYFK<br>HGIQYFnN#NTQHSSLFmLNEVKR<br>LNAENN#ATFYFK<br>HGIQYFnN#nTQHSSLFmLNEVKR<br>HGIQYFnN#NTQHSSLFmLNEVK<br>HGIQYFNN#NTQHSSLFmLNEVK<br>HGIQYFnN#NTQHSSLFmLNEVK |
| 72 | P01031   | Complement C5 OS=Homo sapiens<br>GN=C5 PE=1 SV=4 - [CO5_HUMAN]                     | AN#ISHKdMQLGR<br>YN#FSFR                                                                                                                                                                                                                                                         |
| 73 | P01024   | Complement C3 OS=Homo sapiens<br>GN=C3 PE=1 SV=2 - [CO3_HUMAN]                     | TVLTPATNHmGN#VTFTIPANR<br>TVLTPATNHMGn#VTFTIPAnR<br>TVLTPATNHmGN#VTFTIPAnR<br>TVLTPATNHmGN#VTFTIPAnREFK<br>TVLTPATnHmGN#VTFTIPAnREFK<br>TVLTPATNHMGn#VTFTIPANR                                                                                                                   |
| 74 | P01023   | Alpha-2-macroglobulin OS=Homo<br>sapiens GN=A2M PE=1 SV=3 -<br>[A2MG_HUMAN]        | SLGNVN#FTVSAEALESQELcGTEVPSVPEHG<br>RK<br>SLGNVN#FTVSAEALESqELcGTEVPSVPEHG<br>RK<br>SLGNVN#FTVSAEALESQELcGTEVPSVPEHG<br>R<br>GNEANYYSN#ATTDEHGLVQFSIN#TTNVm<br>GTSLTVR<br>IITILEEEmN#VSVcGLYTYGKVPVPGHVTVSlc<br>R                                                                |

|    |        |                                                                                     |                                                                                                                                                                                                                                                                             |
|----|--------|-------------------------------------------------------------------------------------|-----------------------------------------------------------------------------------------------------------------------------------------------------------------------------------------------------------------------------------------------------------------------------|
|    |        |                                                                                     | SLGNVN#FTVSAEALESqELcGTEVPSVPEHG<br>R<br>GNEANYYSN#ATTDEHGLVQFSIN#TTnVm<br>GTSLTVR<br>IITILEEEMN#VSVcGLYTYGKVPVPGHVTVSic<br>R<br>GcVLLSYLN#ETVTVSASLESVR<br>GNEANYYSN#ATTDEHGLVQFSIN#TTNVM<br>GTSLTVR<br>VSN#qTSLFFTVLQDVPVR                                                |
| 75 | P01019 | Angiotensinogen OS=Homo sapiens<br>GN=AGT PE=1 SV=1 -<br>[ANGT_HUMAN]               | LQAILGVPWKDKN#cTSR<br>VYIHPFHLVIHN#ESTcEQLAK                                                                                                                                                                                                                                |
| 76 | P01011 | Alpha-1-antichymotrypsin OS=Homo sapiens<br>GN=SERPINA3 PE=1 SV=2 -<br>[AACT_HUMAN] | TLN#QSSDELQLSmGnAmFVK<br>YTGN#ASALFILPDQDK<br>TLN#QSSDELQLSMGNAMFVK<br>GLKFN#LTETSEAEIHQSFQHLLR<br>FN#LTETSEAEIHQSFQHLLR<br>YTGN#ASALFILPDQDKmEEVEAmLLPETLKR<br>YTGN#ASALFILPDQDKmEEVEAmLLPETLK<br>APDKNVIFSPLSISTALAFSLGAHN#TTLTEIL<br>K<br>NVIFSPLSISTALAFSLGAHN#TTLTEILK |
| 77 | P01009 | Alpha-1-antitrypsin OS=Homo sapiens<br>GN=SERPINA1 PE=1 SV=3 -<br>[A1AT_HUMAN]      | YLGn#ATAIFFLPDEGK<br>YLGn#ATAIFFLPDEGKLQHLEnELTHDIITK<br>YLGn#ATAIFFLPDEGKLQHLEnELTHDIITK<br>ADTHDEILEGLNFN#LTEIPEAqiHEGFQELLR<br>ADTHDEILEGLnFN#LTEIPEAqiHEGFQELLR<br>qLAHQSN#STnIFFSPVSIATAFAmLSLGTK                                                                      |
| 78 | P01008 | Antithrombin-III OS=Homo sapiens<br>GN=SERPINC1 PE=1 SV=1 -<br>[ANT3_HUMAN]         | WVSN#KTEGR<br>LGAcN#DTLQQLmEVFK<br>LGAcN#DTLQQLmEVFKFDTISEK<br>LGAcN#DTLQQLMEVFK<br>LGAcN#DTLqQLMEVFKFDTISEK<br>LGAcN#DTLQQLMEVFKFDTISEK<br>SLTFN#ETYQDISELVYGAK<br>SLTFN#ETYqDISELVYGAK                                                                                    |
| 79 | P00748 | Coagulation factor XII OS=Homo sapiens<br>GN=F12 PE=1 SV=3 -<br>[FA12_HUMAN]        | RN#HScEPcQTLAVR                                                                                                                                                                                                                                                             |
| 80 | P00747 | Plasminogen OS=Homo sapiens<br>GN=PLG PE=1 SV=2 -<br>[PLMN_HUMAN]                   | GNVAVTVSGHTcQHWSAQTPHTHN#R                                                                                                                                                                                                                                                  |
| 81 | P00738 | Haptoglobin OS=Homo sapiens                                                         | NLFLNHSEN#ATAK                                                                                                                                                                                                                                                              |

|    |          |                                                                                                          |                                                                                                                                                                                                  |
|----|----------|----------------------------------------------------------------------------------------------------------|--------------------------------------------------------------------------------------------------------------------------------------------------------------------------------------------------|
|    |          | GN=HP PE=1 SV=1 - [HPT_HUMAN]                                                                            | NLFLN#HSEN#ATAK<br>nLFLN#HSEN#ATAK<br>VVLHPN#YSQVDIGLIK<br>mVSHHN#LTTGATLINEQWLLTTAK<br>mVSHHN#LTTGATLInEQWLLTTAK<br>MVSHHN#LTTGATLInEqWLLTTAK<br>MVSHHN#LTTGATLINEQWLLTTAK<br>VVLHPN#YSqVDIGLIK |
| 82 | O95497   | Pantetheinase OS=Homo sapiens<br>GN=VNN1 PE=1 SV=2 -<br>[VNN1_HUMAN]                                     | LTGVAGN#YTVcQK                                                                                                                                                                                   |
| 83 | O95445-2 | Isoform 2 of Apolipoprotein M<br>OS=Homo sapiens GN=APOM -<br>[APOM_HUMAN]                               | TEGRPDmKTELFSScPGGImlN#ETGQGYQ<br>R<br>TELFSScPGGImlN#ETGQGYQR                                                                                                                                   |
| 84 | O75882-3 | Isoform 3 of Attractin OS=Homo<br>sapiens GN=ATRN - [ATRN_HUMAN]                                         | IDSTGN#VTNELR<br>ISN#SSDTVEcEcSENWK<br>N#HScSEGQISIFR<br>YN#WSFIHcPAcQcnGHSK<br>EWLPLN#R<br>VFHIHN#ESWVLLTPK<br>mPSQAPTGNFYPLN#SSmclEDSR                                                         |
| 85 | O75144   | ICOS ligand OS=Homo sapiens<br>GN=ICOSLG PE=1 SV=2 -<br>[ICOSL_HUMAN]                                    | TVVYHIPQN#SSELENVDSR                                                                                                                                                                             |
| 86 | K7ER74   | Protein APOC4-APOC2 OS=Homo<br>sapiens GN=APOC4-APOC2 PE=4<br>SV=1 - [K7ER74_HUMAN]                      | mKELLETVVN#R<br>ELLETVVN#R                                                                                                                                                                       |
| 87 | K7EL19   | Zinc finger protein 235 (Fragment)<br>OS=Homo sapiens GN=ZNF235 PE=4<br>SV=1 - [K7EL19_HUMAN]            | IYLN#ETQnYQR                                                                                                                                                                                     |
| 88 | I3L4B9   | Sex hormone-binding globulin<br>OS=Homo sapiens GN=SHBG PE=4<br>SV=1 - [I3L4B9_HUMAN]                    | LDVDQALN#R                                                                                                                                                                                       |
| 89 | H9KV43   | Dynein heavy chain 14, axonemal<br>(Fragment) OS=Homo sapiens<br>GN=DNAH14 PE=4 SV=1 -<br>[H9KV43_HUMAN] | IN#mScAVFITMnPRYGGGVELPDNLK                                                                                                                                                                      |
| 90 | H3BRJ9   | Cholesteryl ester transfer protein<br>OS=Homo sapiens GN=CETP PE=4<br>SV=1 - [H3BRJ9_HUMAN]              | GVVVN#SSVmVK<br>N#VSEDLPLPTFSPTLLGDSR                                                                                                                                                            |
| 91 | G3XAM2   | Complement factor I light chain<br>OS=Homo sapiens GN=CFI PE=3<br>SV=1 - [G3XAM2_HUMAN]                  | FLNN#GTcTAEGK<br>LSDLSIN#STEcLHVHcR<br>SIPAcVPWSPYLFQPN#DTcIVSGWGR                                                                                                                               |
| 92 | F8WEX7   | Cholinesterase OS=Homo sapiens                                                                           | WSDIWN#ATK                                                                                                                                                                                       |

|     |        |                                                                                            |                                                                                                                                                                                                                                                    |
|-----|--------|--------------------------------------------------------------------------------------------|----------------------------------------------------------------------------------------------------------------------------------------------------------------------------------------------------------------------------------------------------|
|     |        | GN=BCHE PE=4 SV=1 -<br>[F8WEX7_HUMAN]                                                      |                                                                                                                                                                                                                                                    |
| 93  | F8WCZ6 | Complement C1s subcomponent<br>OS=Homo sapiens GN=C1S PE=3<br>SV=1 - [F8WCZ6_HUMAN]        | YTcEEPYYYmEnGGGGEYHcAGN#GSWVNE<br>VLGPELPK<br>NcGVN#cSGDVFTALIGEIASPNYPKYPENS<br>R<br>NcGVN#cSGDVFTALIGEIASPnYPKYPENS<br>R                                                                                                                         |
| 94  | F8W1Q3 | Biotinidase OS=Homo sapiens<br>GN=BTD PE=4 SV=1 -<br>[F8W1Q3_HUMAN]                        | FN#DTEVLQR<br>NPVGLIGAEN#ATGETDPSHSK<br>nPVGLIGAEN#ATGETDPSHSK<br>DVQIIVFPEDGIHGFN#FTR                                                                                                                                                             |
| 95  | F5H7E1 | Uncharacterized protein OS=Homo<br>sapiens GN=ITIH1 PE=1 SV=1 -<br>[F5H7E1_HUMAN]          | IcDLLVANNHFAHFFAPQN#LTNmNK<br>DKIcDLLVANnHFAHFFAPQN#LTNmNK<br>IcDLLVANnHFAHFFAPQN#LTNmNK<br>IcDLLVANNHFAHFFAPQN#LTNmNK<br>DKIcDLLVANNHFAHFFAPQN#LTNmNK<br>DKIcDLLVANnHFAHFFAPQN#LTNmNK<br>AN#LSSQALQmSLDYGFVTPLTmSIR<br>AN#LSSqALQMSLDYGFVTPLTmSIR |
| 96  | F5H4W9 | Serum paraoxonase/arylesterase 1<br>OS=Homo sapiens GN=PON1 PE=4<br>SV=1 - [F5H4W9_HUMAN]  | HAN#WTLTPLK<br>VTQVYAEN#GTVLQGSTVASVYK                                                                                                                                                                                                             |
| 97  | F5GY80 | Complement component C8 beta<br>chain OS=Homo sapiens GN=C8B<br>PE=4 SV=1 - [F5GY80_HUMAN] | EYESYDFERN#VTEK                                                                                                                                                                                                                                    |
| 98  | E9PIT3 | Thrombin light chain OS=Homo<br>sapiens GN=F2 PE=3 SV=1 -<br>[E9PIT3_HUMAN]                | SRYPHKPEIN#STTHPGADLQEnFcR<br>SRYPHKPEIN#STTHPGADLQENFcR<br>YPHKPEIN#STTHPGADLqEnFcR<br>YPHKPEIN#STTHPGADLQENFcR<br>YPHKPEIN#STTHPGADLQEnFcR<br>N#FTENDLLVR                                                                                        |
| 99  | E9PFZ2 | Ceruloplasmin OS=Homo sapiens<br>GN=CP PE=4 SV=1 -<br>[E9PFZ2_HUMAN]                       | EHEGAIYPDn#TTDFQR<br>ELHHLqEQN#VSnAFLDK<br>ELHHLQEQN#VSnAFLDK<br>ELHHLQEQN#VSnAFLDK<br>ELHHLQEQN#VSnAFLDKGEFYIGSK<br>EN#LTAPGSDSAVFFEQGTTR<br>AGLQAFFQVQEcN#K<br>EN#LTAPGSDSAVFFEqGTTR                                                             |
| 100 | E9PBC5 | Plasma kallikrein heavy chain<br>OS=Homo sapiens GN=KLKB1 PE=3<br>SV=1 - [E9PBC5_HUMAN]    | GVNFN#VSK<br>LQAPLN#YTEFQKPicLPSK<br>IYSGILN#LSDITK<br>IYPGVDFGGEELN#VTFVK                                                                                                                                                                         |

|     |        |                                                                                                        |                                                                                                                                                                                                      |
|-----|--------|--------------------------------------------------------------------------------------------------------|------------------------------------------------------------------------------------------------------------------------------------------------------------------------------------------------------|
|     |        |                                                                                                        | IVGGTN#SSWGEWPWQVSLQVK                                                                                                                                                                               |
| 101 | E7ETN3 | Uncharacterized protein OS=Homo sapiens PE=3 SV=1 - [E7ETN3_HUMAN]                                     | LTDTIcGVGN#mSAnASDQER<br>TmFPN#LTDVR<br>ALqAVYSmmSWPDDVPPEGWN#R<br>SPYYN#VSDEISFHcYDGYTLR<br>KIVLDPSGSmNIYLVLDGSDSIGASN#FTGAK<br>KIVLDPSGSmNIYLVLDGSDSIGASN#FTGAK<br>IVLDPSGSmNIYLVLDGSDSIGASN#FTGAK |
| 102 | E7ESS4 | Intercellular adhesion molecule 1 OS=Homo sapiens GN=ICAM1 PE=1 SV=1 - [E7ESS4_HUMAN]                  | LNPTVTYGN#DSFSAK                                                                                                                                                                                     |
| 103 | E7EQ48 | Proteoglycan 4 OS=Homo sapiens GN=PRG4 PE=1 SV=1 - [E7EQ48_HUMAN]                                      | N#GTLVAFR                                                                                                                                                                                            |
| 104 | E7EPG1 | Multimerin-1 OS=Homo sapiens GN=MMRN1 PE=4 SV=1 - [E7EPG1_HUMAN]                                       | VN#ESVVSIAAQK                                                                                                                                                                                        |
| 105 | D6RIS9 | Selenoprotein P (Fragment) OS=Homo sapiens GN=SEPP1 PE=4 SV=1 - [D6RIS9_HUMAN]                         | EGYSN#ISYIVVNHQGISSR                                                                                                                                                                                 |
| 106 | D6RD17 | Immunoglobulin J chain (Fragment) OS=Homo sapiens GN=IGJ PE=1 SV=2 - [D6RD17_HUMAN]                    | EN#ISDPTSPLR<br>IIVPLNNREN#ISDPTSPLR                                                                                                                                                                 |
| 107 | C9JX71 | Apolipoprotein D (Fragment) OS=Homo sapiens GN=APOD PE=4 SV=1 - [C9JX71_HUMAN]                         | clQAN#YSLmENgK<br>clQAN#YSLmEnGK<br>ADGTVNqIEGEATPVN#LTEPAK<br>ADGTVNQIEGEATPVN#LTEPAK<br>ADGTVnQIEGEATPVN#LTEPAKLEVK<br>ADGTVNQIEGEATPVN#LTEPAKLEVK                                                 |
| 108 | C9JMA2 | Mannan-binding lectin serine protease 1 (Fragment) OS=Homo sapiens GN=MASP1 PE=4 SV=2 - [C9JMA2_HUMAN] | FGYLHTDN#R                                                                                                                                                                                           |
| 109 | C9JEV0 | Zinc-alpha-2-glycoprotein OS=Homo sapiens GN=AZGP1 PE=3 SV=1 - [C9JEV0_HUMAN]                          | FGcEIENN#R<br>DIVEYYNDSN#GSHVLQGR<br>DIVEYYN#DSN#GSHVLQGR<br>AREDIFmETLKDIVEYYN#DSNGSHVLQGR<br>EDIFmETLKDIVEYYNDSN#GSHVLQGR                                                                          |
| 110 | C9JCF5 | Kaliocin-1 (Fragment) OS=Homo sapiens GN=LTF PE=1 SV=1 - [C9JCF5_HUMAN]                                | TAGWNVPIGTLRPFNL#WTGPPEPIEAAVAR                                                                                                                                                                      |
| 111 | B7Z3Y2 | Prenylcysteine oxidase 1 OS=Homo sapiens GN=PCYOX1 PE=1 SV=1 - [B7Z3Y2_HUMAN]                          | GELN#TSIFSSRPIDK<br>LLHALGGDDFLGmLN#R                                                                                                                                                                |

|     |        |                                                                                                                                           |                                                                                |
|-----|--------|-------------------------------------------------------------------------------------------------------------------------------------------|--------------------------------------------------------------------------------|
| 112 | B7Z3A7 | Calcium/calmodulin-dependent<br>3',5'-cyclic nucleotide<br>phosphodiesterase 1A OS=Homo<br>sapiens GN=PDE1A PE=2 SV=1 -<br>[B7Z3A7_HUMAN] | LmqEEEMnILIN#LSKDDWRDLR                                                        |
| 113 | B4E1H2 | Plasma protease C1 inhibitor<br>OS=Homo sapiens GN=SERPING1<br>PE=2 SV=1 - [B4E1H2_HUMAN]                                                 | DTFVN#ASR<br>VLSN#NSDANLELINTWVAK<br>VGQLQLSHN#LSLVILVPQNLK                    |
| 114 | B4DWL3 | Lysosome-associated membrane<br>glycoprotein 1 OS=Homo sapiens<br>GN=LAMP1 PE=1 SV=1 -<br>[B4DWL3_HUMAN]                                  | GHTLTLN#FTR                                                                    |
| 115 | B3KWK7 | Insulin-like growth factor binding<br>protein 3, isoform CRA_b OS=Homo<br>sapiens GN=IGFBP3 PE=2 SV=1 -<br>[B3KWK7_HUMAN]                 | GLcVN#ASAVSR<br>AYLLPAPPAPGN#ASESEEDR                                          |
| 116 | P80108 | Neutrophil gelatinase-associated<br>lipocalin OS=Homo sapiens<br>GN=LCN2 PE=1 SV=2 -<br>[NGAL_HUMAN]                                      | LGTSLSSGHVlMn#GTLK<br>N#LTTSLTESVDR<br>LNVEAAN#WTVR<br>FHDVSESTHWTPFLN#ASVHYIR |
